# Supplementary material for: Potential Anticancer Lipoxygenase Inhibitors from the Red Sea-Derived Brown Algae Sargassum cinereum: An In-Silico-Supported In-Vitro Study
Source: MDPI journal article supplement (doi:10.3390/antibiotics10040416), 2021-04-10
Supplement: s1 [file s1]

1 **SUPPLEMENTARY DATA**

2 **Potential Anticancer Lipoxygenase Inhibitors from the Red Sea-Derived**  
3 **Brown Algae *Sargassum cinereum*: An *In-Silico*-Supported *In-Vitro* Study**

4 **Sami I. Alzarea<sup>1‡</sup>, Abeer H. Elmaidomy<sup>2‡</sup>, Hani Saber<sup>3</sup>, Arafa Musa<sup>4,5</sup>, Mohammad M. Al-Sanea<sup>6</sup>,**  
5 **Ehab M. Mostafa<sup>4,5</sup>, Omnia Magdy Hendawy<sup>1,7</sup>, Khayrya A. Youssif<sup>8</sup>, Abdullah S. Alanazi<sup>9</sup>, Metab**  
6 **Alharbi<sup>10</sup>, Ahmed M. Sayed<sup>11\*</sup>, Usama Ramadan Abdelmohsen<sup>12,13\*</sup>**

7 <sup>1</sup>Department of Pharmacology, College of Pharmacy, Jouf University, Sakaka, Aljouf 72341, Saudi  
8 Arabia

9 <sup>2</sup>Department of Pharmacognosy, Faculty of Pharmacy, Beni-Suef University, Beni-Suef 62511, Egypt

10 <sup>3</sup>Department of Botany and Microbiology, Faculty of Science, South Valley University, 83523, Qena,  
11 Egypt

12 <sup>4</sup>Department of Pharmacognosy, College of Pharmacy, Jouf University 72341, Sakaka, Saudi Arabia

13 <sup>5</sup>Department of Pharmacognosy, Faculty of Pharmacy, Al-Azhar University, Cairo, 11371, Egypt

14 <sup>6</sup>Department of Pharmaceutical Chemistry, College of Pharmacy, Jouf University 72341, Sakaka, Saudi  
15 Arabia

16 <sup>7</sup>Clinical Pharmacology Department, Faculty of Medicine, Beni-Suef University, Egypt

17 <sup>8</sup>Department of Pharmacognosy, Faculty of Pharmacy, Modern University for Technology and  
18 Information, Cairo, Egypt

19 <sup>9</sup>Clinical Pharmacy Department, College of Pharmacy, Jouf University, Sakaka, Aljouf 72341, Saudi  
20 Arabia

21 <sup>10</sup>Department of Pharmacology and Toxicology, College of Pharmacy, King Saud University, P.O. Box  
22 2457, Riyadh, 11451, Saudi Arabia.

23 <sup>11</sup>Department of Pharmacognosy, Faculty of Pharmacy, Nahda University, 62513, Beni-Suef, Egypt

24 <sup>12</sup>Department of Pharmacognosy, Faculty of Pharmacy, Minia University, Minia 61519, Egypt

25 <sup>13</sup>Department of Pharmacognosy, Faculty of Pharmacy, Deraya University, 7 Universities Zone, New  
26 Minia 61111, Egypt

27  
28 \*Corresponding authors: AMS: Department of Pharmacognosy, Faculty of Pharmacy, Nahda University,  
29 62513, Beni-Suef, Egypt, [ahmed.mohamed.sayed@nub.edu.eg](mailto:ahmed.mohamed.sayed@nub.edu.eg); URA: Department of Pharmacognosy,  
30 Faculty of Pharmacy, Minia University, Minia 61519, Egypt, [usama.ramadan@mu.edu.eg](mailto:usama.ramadan@mu.edu.eg).

31 ‡ Those authors have equally contributed.

32

## List of Contents

|                    |                                                                                                                    |
|--------------------|--------------------------------------------------------------------------------------------------------------------|
| <b>Table S1.</b>   | Dereplicated metabolites from LC-HRESIMS analysis of <i>Sarragassum cinnerum</i>                                   |
| <b>Figure S1.</b>  | LC-HRESIMS Chromatogram of the dereplicated metabolites of <i>Sarragassum cinnerum</i> (positive)                  |
| <b>Figure S2.</b>  | LC-HRESIMS Chromatogram of the dereplicated metabolites of <i>Sarragassum cinnerum</i> (negative)                  |
| <b>Figure S3.</b>  | <sup>1</sup> H NMR spectrum of compound <b>12</b> measured in DMSO- <i>d</i> <sub>6</sub> at 400 MHz               |
| <b>Figure S4.</b>  | DEPT-Q NMR spectrum of compound <b>12</b> measured in DMSO- <i>d</i> <sub>6</sub> at 100 MHz                       |
| <b>Figure S5.</b>  | HSQC spectrum of compound <b>12</b> measured in DMSO- <i>d</i> <sub>6</sub>                                        |
| <b>Figure S6.</b>  | HMBC spectrum of compound <b>12</b> measured in DMSO- <i>d</i> <sub>6</sub>                                        |
| <b>Figure S7.</b>  | HRESIMS spectrum of compound <b>12</b>                                                                             |
| <b>Figure S8.</b>  | <sup>1</sup> H NMR spectrum of compound <b>13</b> measured in DMSO- <i>d</i> <sub>6</sub> at 400 MHz               |
| <b>Figure S9.</b>  | DEPT-Q NMR spectrum of compound <b>13</b> measured in DMSO- <i>d</i> <sub>6</sub> at 100 MHz.                      |
| <b>Figure S10.</b> | HSQC spectrum of compound <b>13</b> measured in DMSO- <i>d</i> <sub>6</sub>                                        |
| <b>Figure S11.</b> | HMBC spectrum of compound <b>13</b> measured in DMSO- <i>d</i> <sub>6</sub>                                        |
| <b>Figure S12.</b> | HRESIMS spectrum of compound <b>13</b>                                                                             |
| <b>Figure S13.</b> | <sup>1</sup> H NMR spectrum of compound <b>14</b> measured in DMSO- <i>d</i> <sub>6</sub> at 400 MHz               |
| <b>Figure S14.</b> | DEPT-Q NMR spectrum of compound <b>14</b> measured in DMSO- <i>d</i> <sub>6</sub> at 100 MHz.                      |
| <b>Figure S15.</b> | <sup>1</sup> H NMR spectrum of compound <b>15</b> measured in DMSO- <i>d</i> <sub>6</sub> at 400 MHz               |
| <b>Figure S16.</b> | DEPT-Q NMR spectrum of compound <b>15</b> measured in DMSO- <i>d</i> <sub>6</sub> at 100 MHz                       |
| <b>Figure S17.</b> | <sup>1</sup> H NMR spectrum of compound <b>16</b> measured in DMSO- <i>d</i> <sub>6</sub> at 400 MHz               |
| <b>Figure S18.</b> | DEPT-Q NMR spectrum of compound <b>16</b> measured in DMSO- <i>d</i> <sub>6</sub> at 100 MHz                       |
| <b>Figure S19.</b> | <sup>1</sup> H NMR spectrum of compound <b>17</b> measured in DMSO- <i>d</i> <sub>6</sub> at 400 MHz               |
| <b>Figure S20.</b> | DEPT-Q NMR spectrum of compound <b>17</b> measured in DMSO- <i>d</i> <sub>6</sub> at 100 MHz                       |
| <b>Figure S21.</b> | <sup>1</sup> H NMR spectrum of compound <b>18</b> measured in CD <sub>3</sub> OD- <i>d</i> <sub>4</sub> at 400 MHz |
| <b>Figure S22.</b> | DEPT-Q NMR spectrum of compound <b>18</b> measured in CD <sub>3</sub> OD- <i>d</i> <sub>6</sub> at 100 MHz         |
| <b>Figure S23.</b> | <sup>1</sup> H NMR spectrum of compound <b>19</b> measured in CD <sub>3</sub> OD- <i>d</i> <sub>4</sub> at 400 MHz |
| <b>Figure S24.</b> | DEPT-Q NMR spectrum of compound <b>19</b> measured in CD <sub>3</sub> OD- <i>d</i> <sub>6</sub> at 100 MHz         |
| <b>Figure S25.</b> | <sup>1</sup> H NMR spectrum of compound <b>20</b> measured in DMSO- <i>d</i> <sub>6</sub> at 400 MHz               |
| <b>Figure S26.</b> | DEPT-Q NMR spectrum of compound <b>20</b> measured in DMSO- <i>d</i> <sub>6</sub> at 100 MHz                       |
| <b>Figure S27.</b> | <sup>1</sup> H NMR spectrum of compound <b>21</b> measured in D <sub>2</sub> O at 400 MHz                          |
| <b>Figure S28.</b> | DEPT-Q NMR spectrum of compound <b>21</b> measured in D <sub>2</sub> O at 100 MHz                                  |

**Table S1.** Dereplicated metabolites using the Dictionary of Natural Products database from LC-HRESIMS analysis of *Sargassum cinnerum*

| No. | Metabolites name                                                   | Original source                | MF                                                | RT(min.) | <i>m/z</i> | MS <sup>2</sup> Fragmentation   | Ionization Mode    |
|-----|--------------------------------------------------------------------|--------------------------------|---------------------------------------------------|----------|------------|---------------------------------|--------------------|
| 1   | (5R,7S,8S)-Communiol A                                             | <i>Sargassum spp.</i>          | C <sub>11</sub> H <sub>20</sub> O <sub>4</sub>    | 3.76288  | 215.1283   | 119.1183, 153.1283,<br>179.1075 | [M-H] <sup>-</sup> |
| 2   | Hedaol A                                                           | <i>Sargassum spp.</i>          | C <sub>18</sub> H <sub>30</sub> O <sub>2</sub>    | 6.7354   | 277.2162   | 237.1864, 219.1752              | [M-H] <sup>-</sup> |
| 3   | Arachidonic acid                                                   | <i>Sargassum pallidum</i>      | C <sub>20</sub> H <sub>34</sub> O <sub>2</sub>    | 6.6166   | 307.2624   | 289.2528, 271.2424,<br>245.2266 | [M+H] <sup>+</sup> |
| 4   | Sargachromanol A                                                   | <i>Sargassum siliquastrum</i>  | C <sub>22</sub> H <sub>30</sub> O <sub>3</sub>    | 5.3686   | 343.2276   | 325.2158, 285.1853,<br>273.1850 | [M+H] <sup>+</sup> |
| 5   | 2-Geranylgeranyl-6-methylbenzoquinone                              | <i>Sargassum micracanthum.</i> | C <sub>27</sub> H <sub>38</sub> O <sub>2</sub>    | 4.4710   | 395.2950   | 259.2425, 257.1534              | [M+H] <sup>+</sup> |
| 6   | 24-Ethylcholesta-4,24(28)-dien-3,6-dione                           | <i>Sargassum carpophyllum</i>  | C <sub>29</sub> H <sub>44</sub> O <sub>2</sub>    | 6.5544   | 425.3420   | 313.2157, 285.1854              | [M+H] <sup>+</sup> |
| 7   | Saringosterone                                                     | <i>Sargassum asperfolium</i>   | C <sub>29</sub> H <sub>46</sub> O <sub>2</sub>    | 6.6324   | 427.3576   | 411.3262, 391.3363,<br>177.1277 | [M+H] <sup>+</sup> |
| 8   | Nahocol A                                                          | <i>Sargassum siliquastrum</i>  | C <sub>29</sub> H <sub>42</sub> O <sub>6</sub>    | 6.6773   | 487.3060   | 459.3109, 373.2375              | [M+H] <sup>+</sup> |
| 9   | 24xi-Hydroperoxy-24-vinylcholesterol                               | <i>Sargassum carpophyllum</i>  | C <sub>29</sub> H <sub>48</sub> O <sub>3</sub>    | 6.5615   | 445.3682   | 373.2215                        | [M+H] <sup>+</sup> |
| 10  | Sargathunbergol A                                                  | <i>Sargassum thunbergii</i>    | C <sub>27</sub> H <sub>38</sub> O <sub>6</sub>    | 5.7502   | 459.2749   | 285.1855, 257.1534              | [M+H] <sup>+</sup> |
| 11  | 1-O-(11-Hexadecenoyl)-3-O-(6'-sulfo-a-D-quinovopyranosyl) glycerol | <i>Sargassum hemiphyllum</i>   | C <sub>25</sub> H <sub>46</sub> O <sub>11</sub> S | 4.4836   | 553.2681   | -                               | [M-H] <sup>-</sup> |

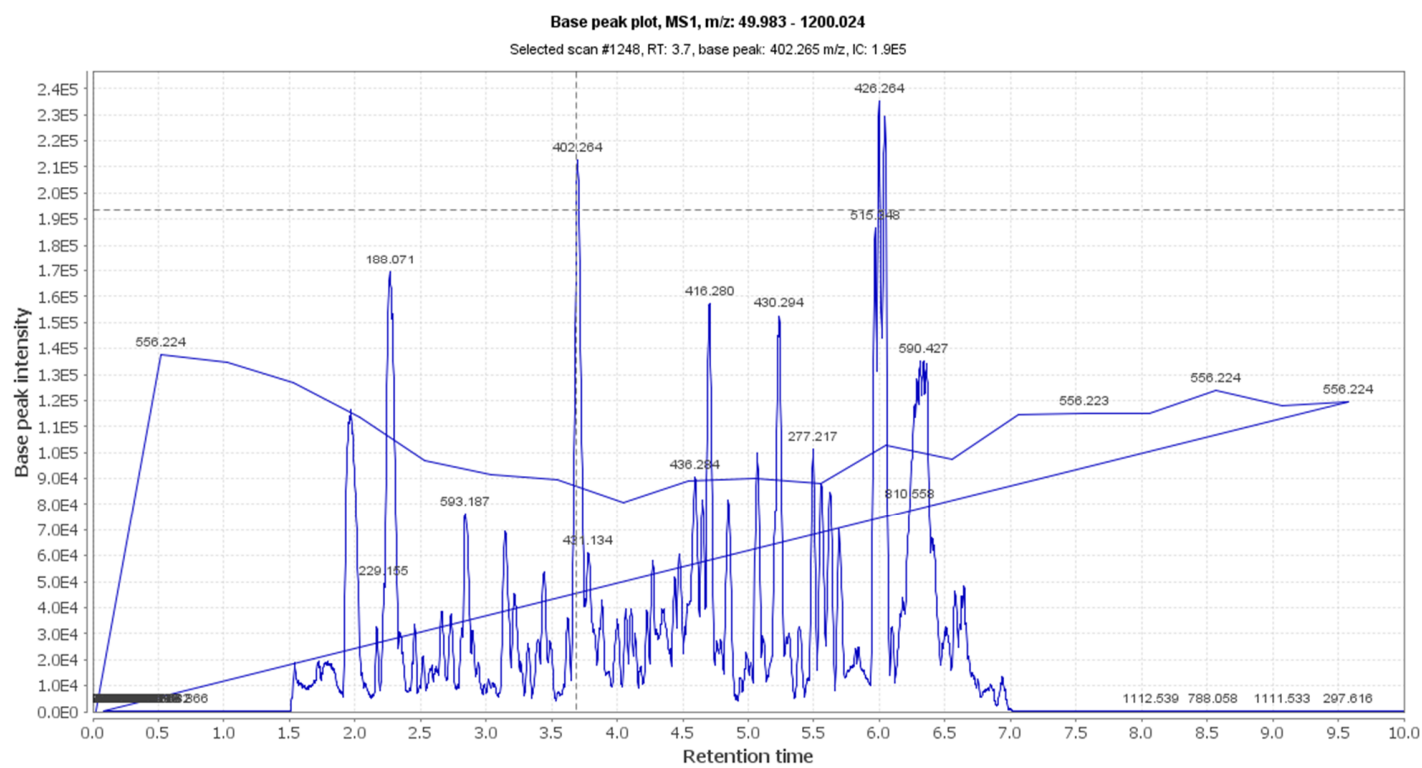

**Figure S1.** LC-HRESIMS Chromatogram of the dereplicated metabolites of *Sarragassum cinnerum* (positive)

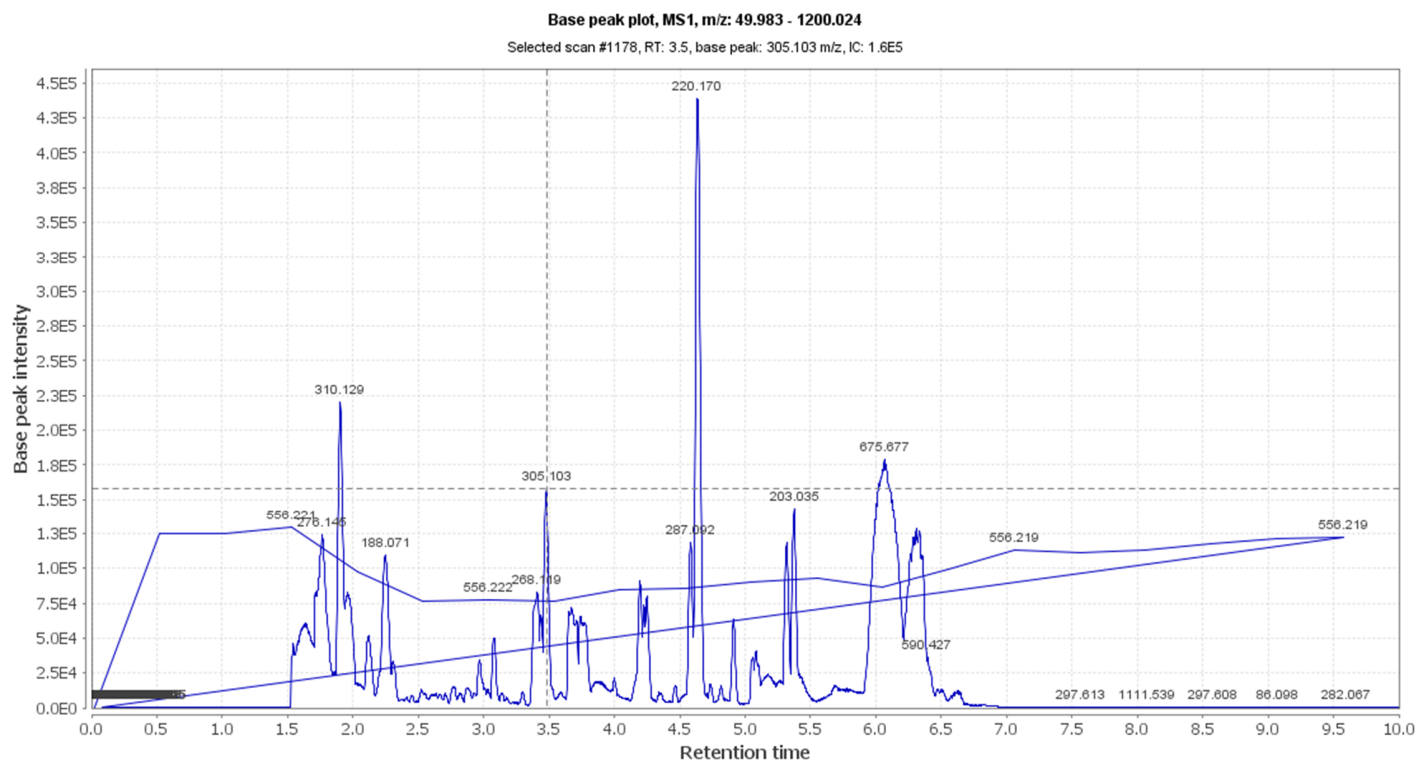

**Figure S2.** LC-HRESIMS Chromatogram of the dereplicated metabolites of *Sarragassum cinnerum* (negative)

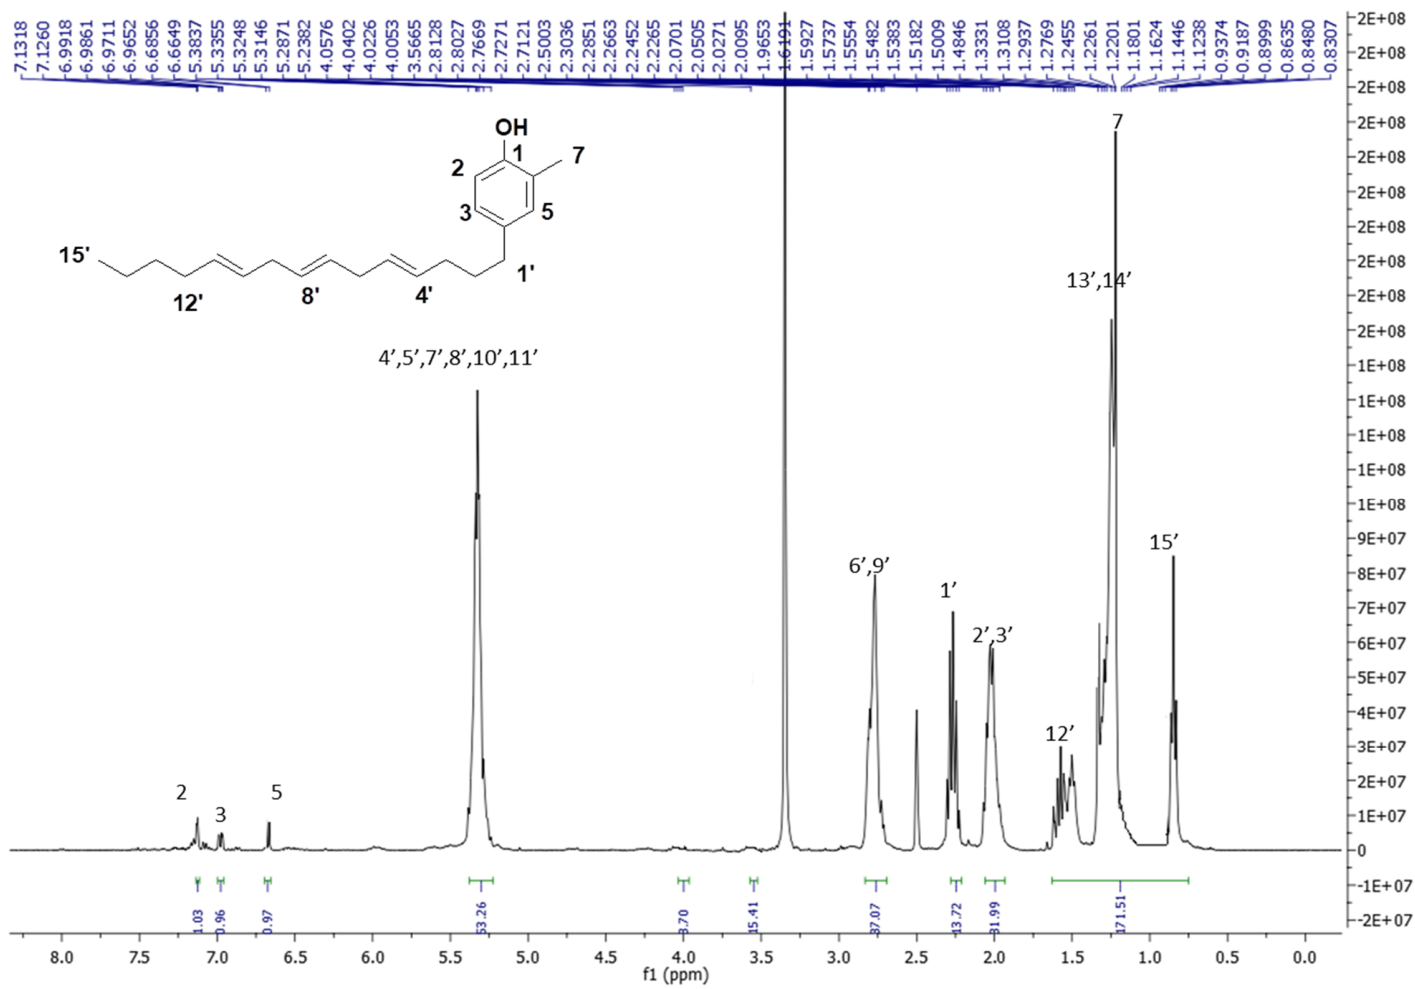

Figure S3. <sup>1</sup>H NMR spectrum of compound 12 measured in DMSO-*d*<sub>6</sub> at 400 MHz

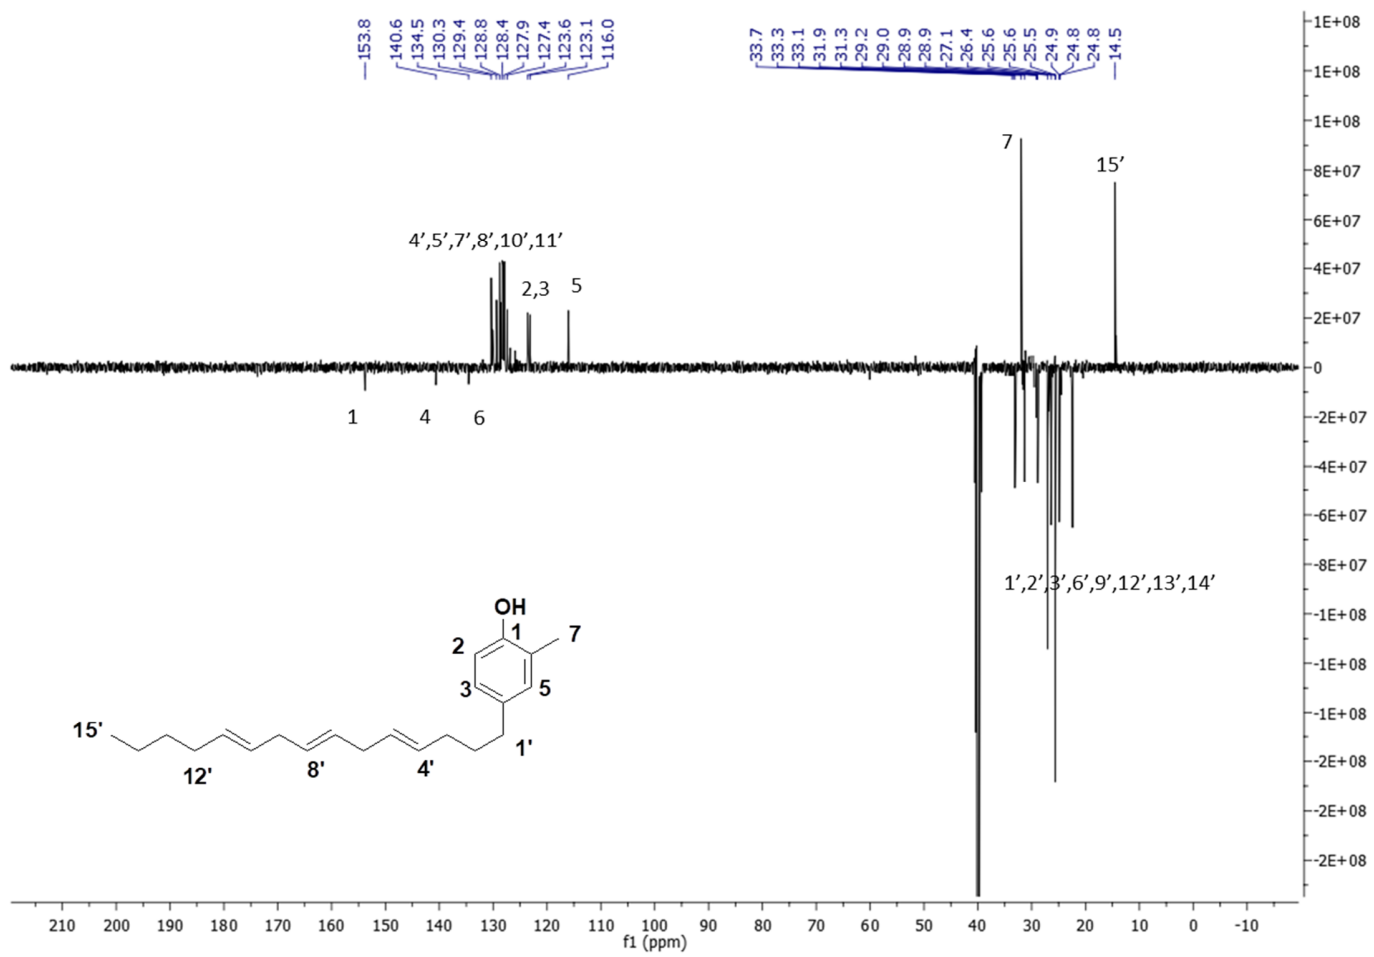

**Figure S4.** DEPT-Q NMR spectrum of compound **12** measured in DMSO-*d*<sub>6</sub> at 100 MHz.

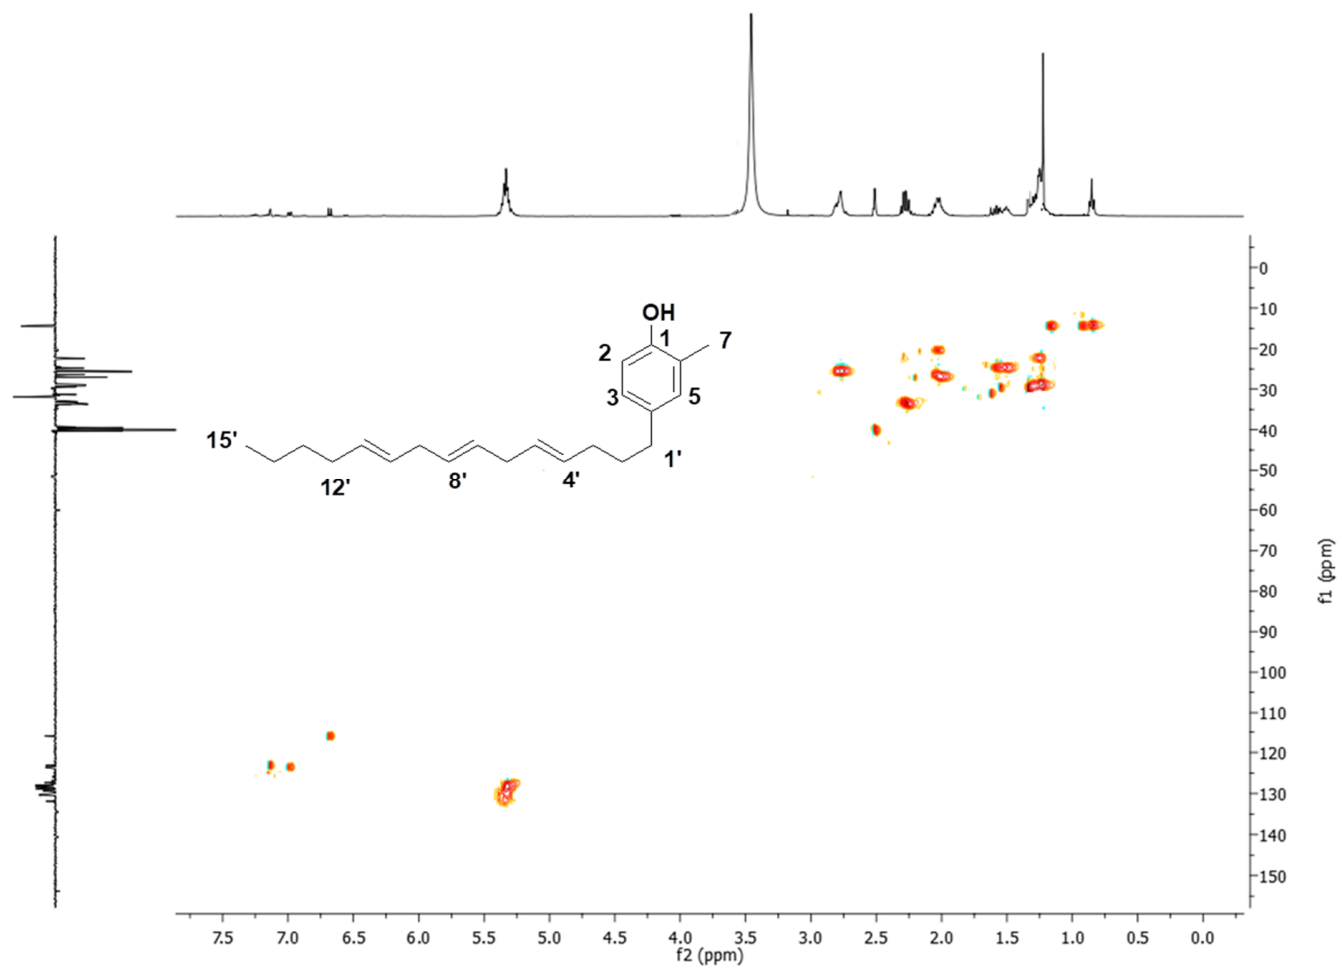

**Figure S5.** HSQC spectrum of compound **12** measured in  $\text{DMSO-}d_6$



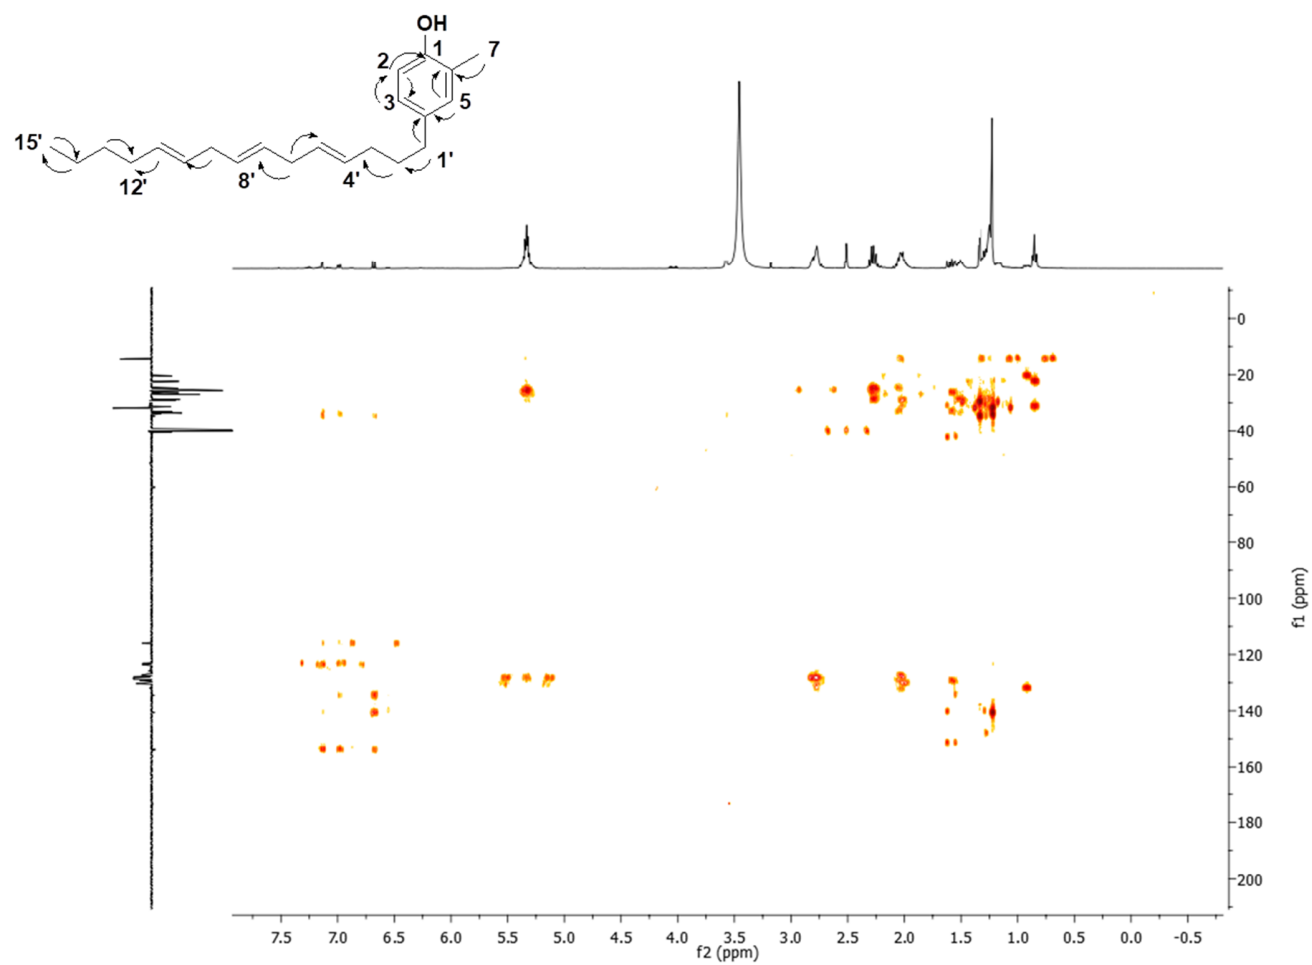

**Figure S6.** HMBC spectrum of compound 12 measured in DMSO-*d*<sub>6</sub>

UR12\_ESI\_Positive\_0311

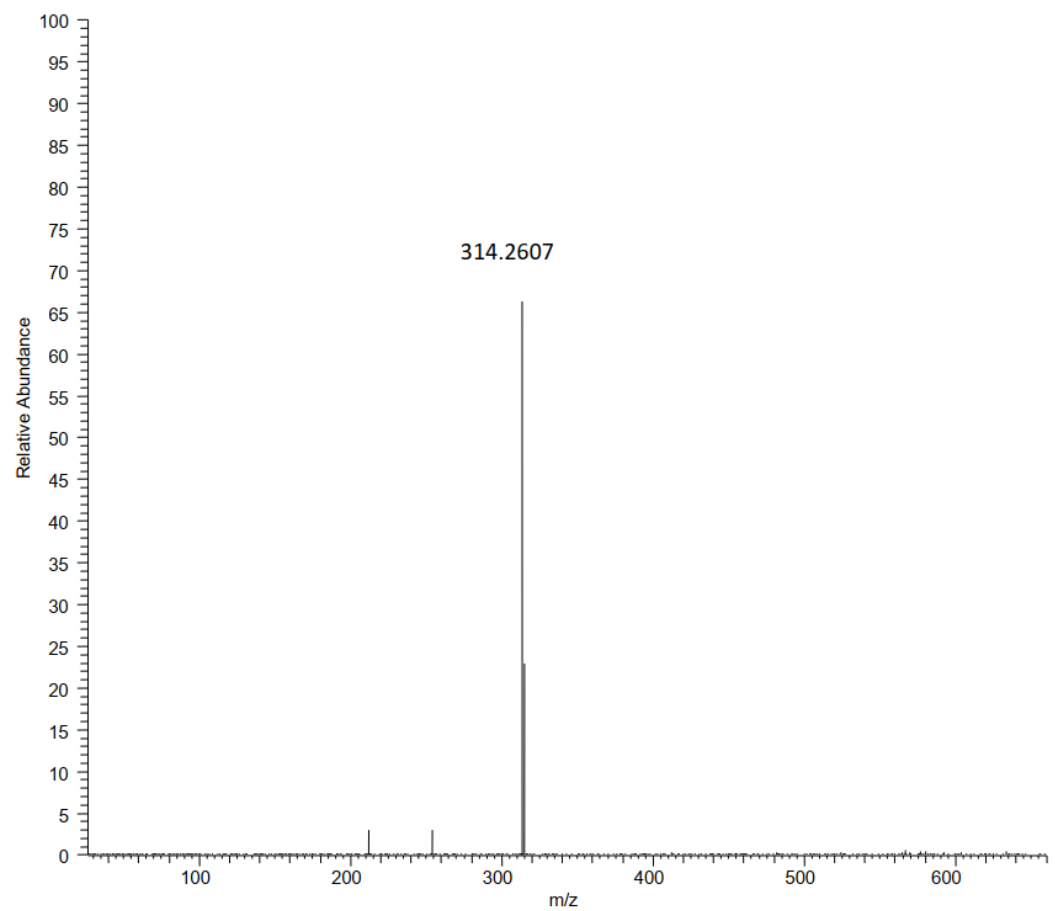

**Figure S7.** HRESIMS spectrum of compound **12**

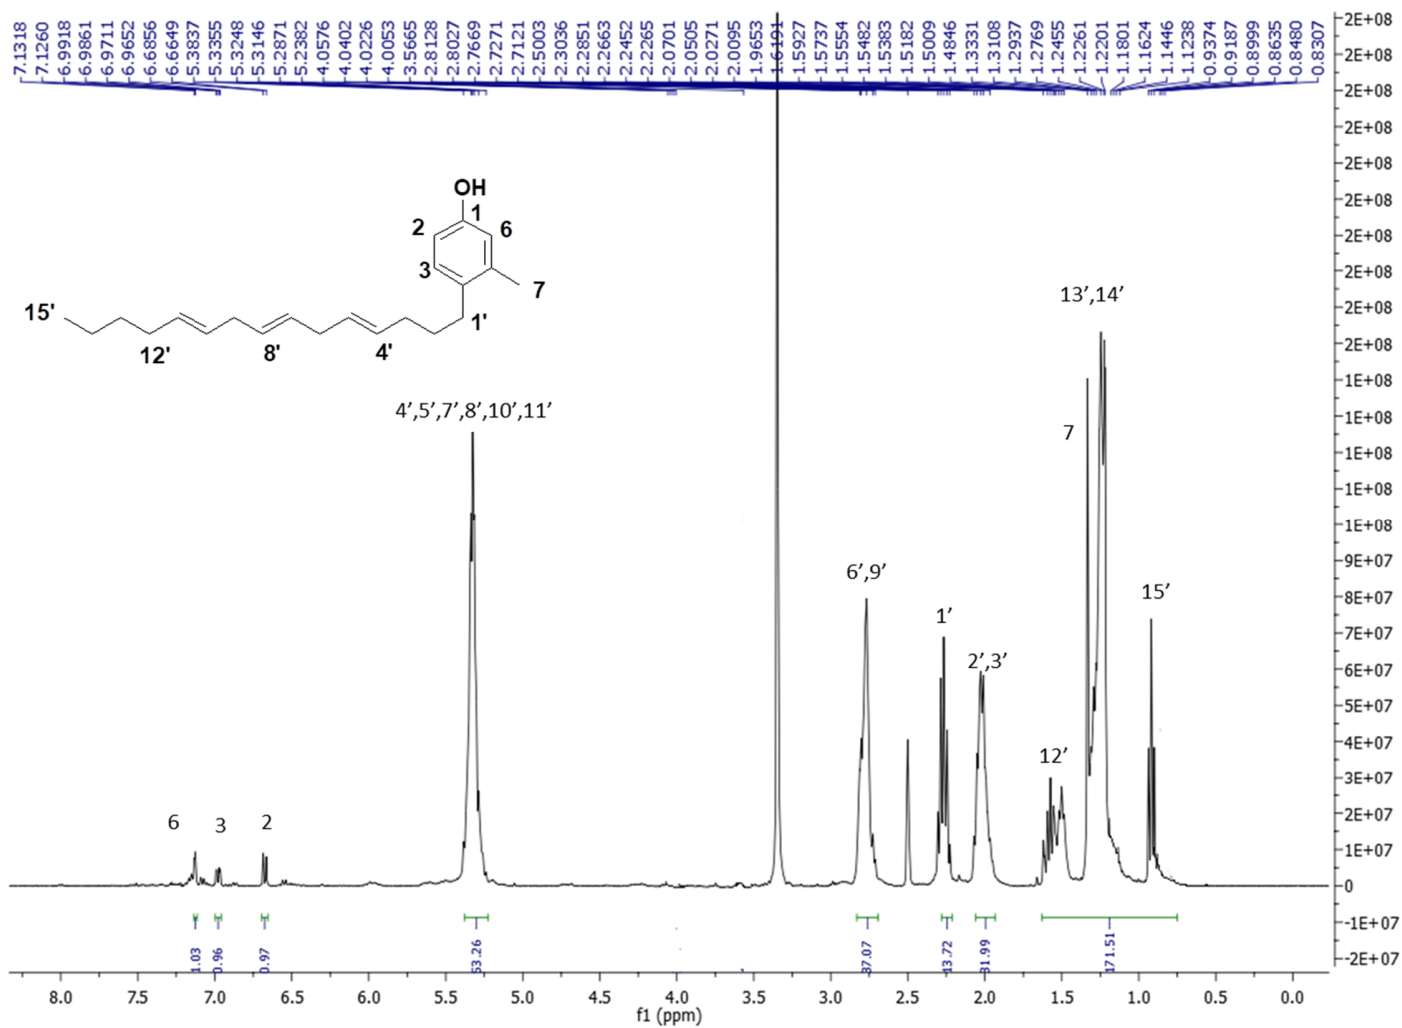

Figure S8. <sup>1</sup>H NMR spectrum of compound 13 measured in DMSO-*d*<sub>6</sub> at 400 MHz

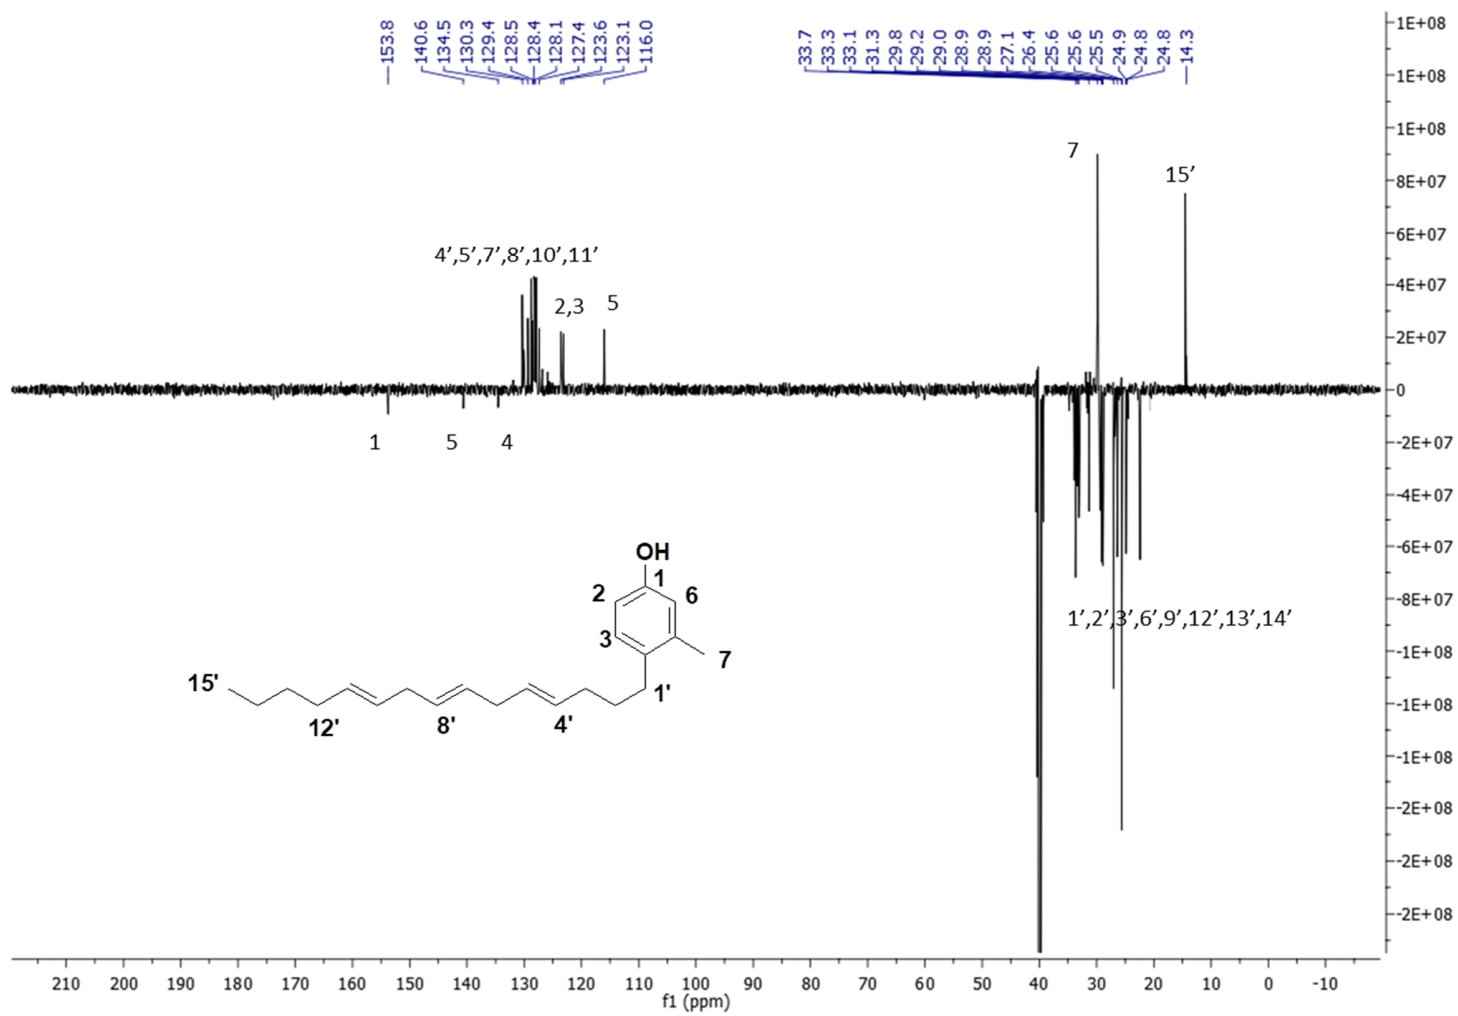

Figure S9. DEPT-Q NMR spectrum of compound **13** measured in DMSO- $d_6$  at 100 MHz.

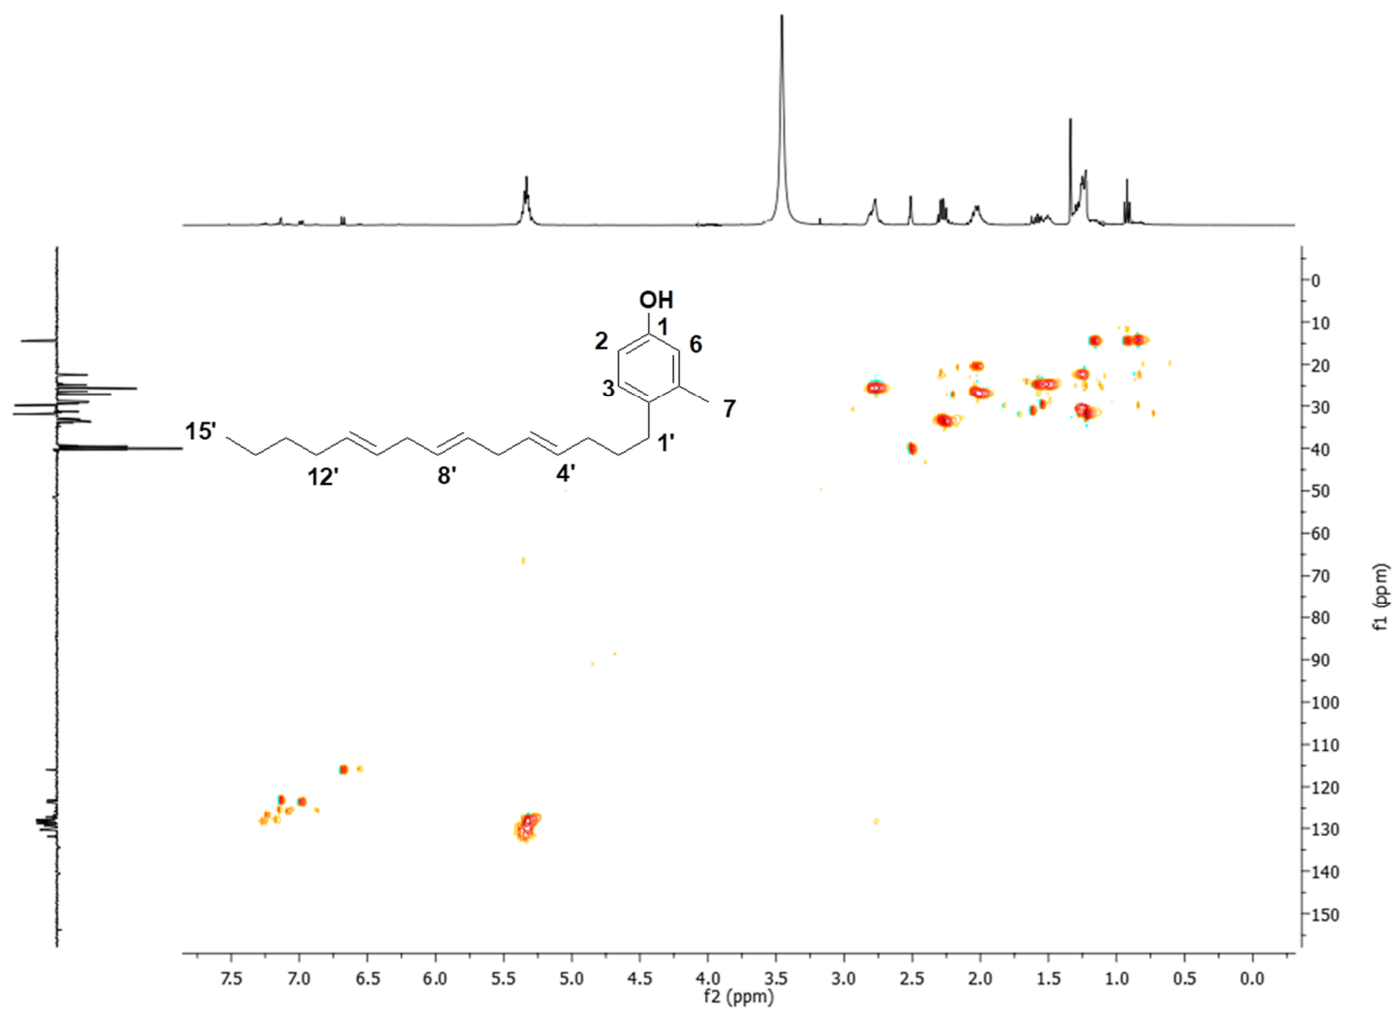

**Figure S10.** HSQC spectrum of compound **13** measured in DMSO-*d*<sub>6</sub>

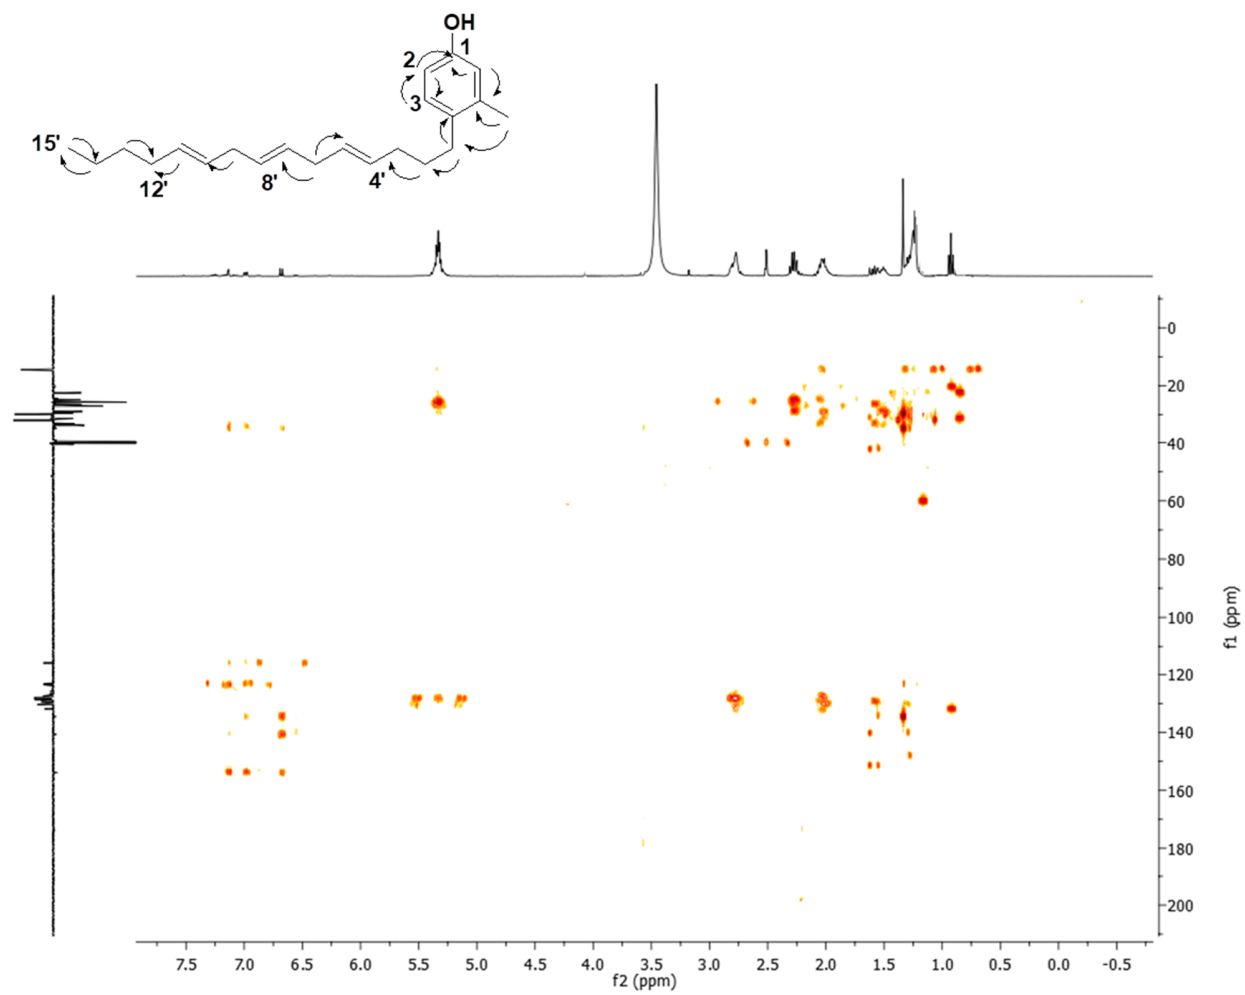

**Figure S11.** HMBC spectrum of compound **13** measured in DMSO- $d_6$

UR13\_ESI\_Positive\_0311

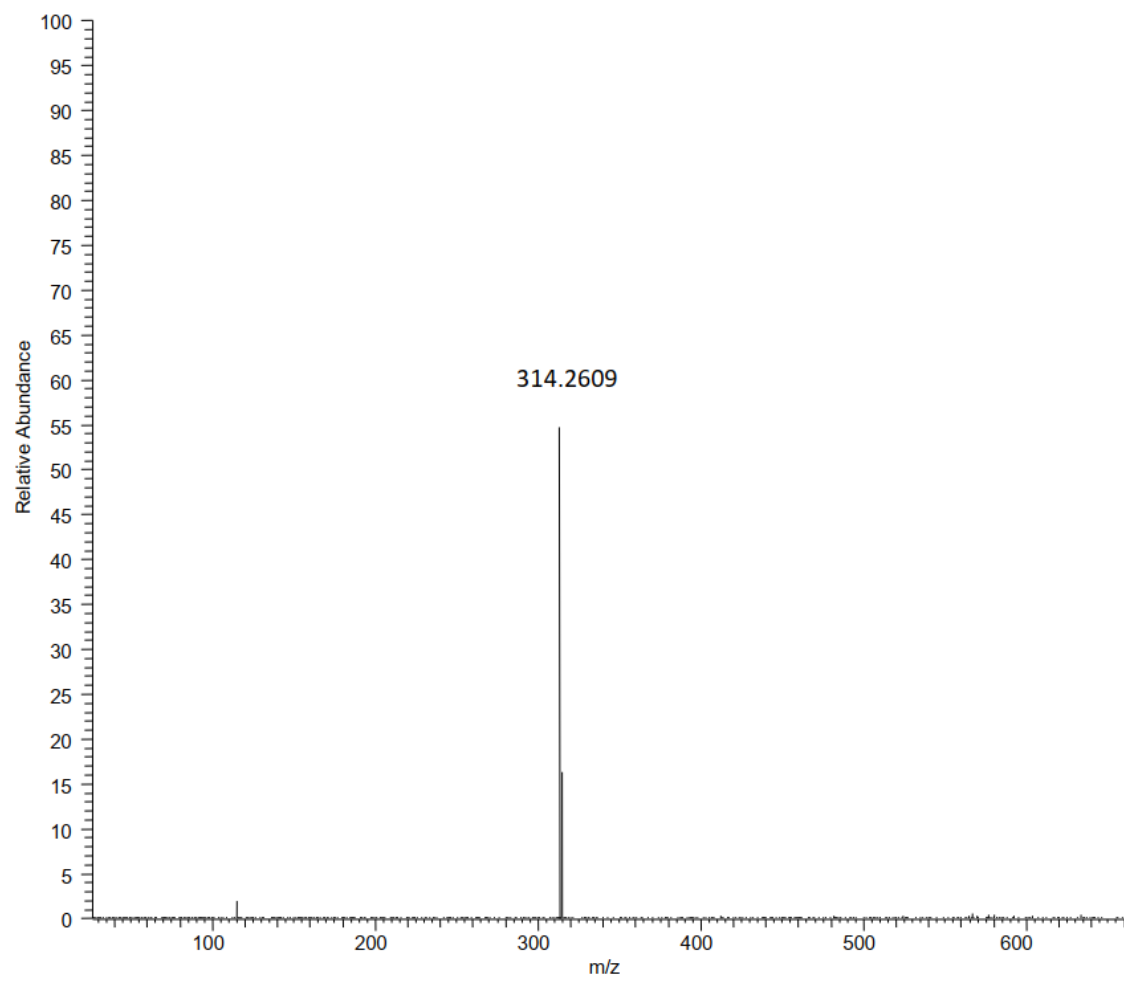

**Figure S12.** HRESIMS spectrum of compound **13**

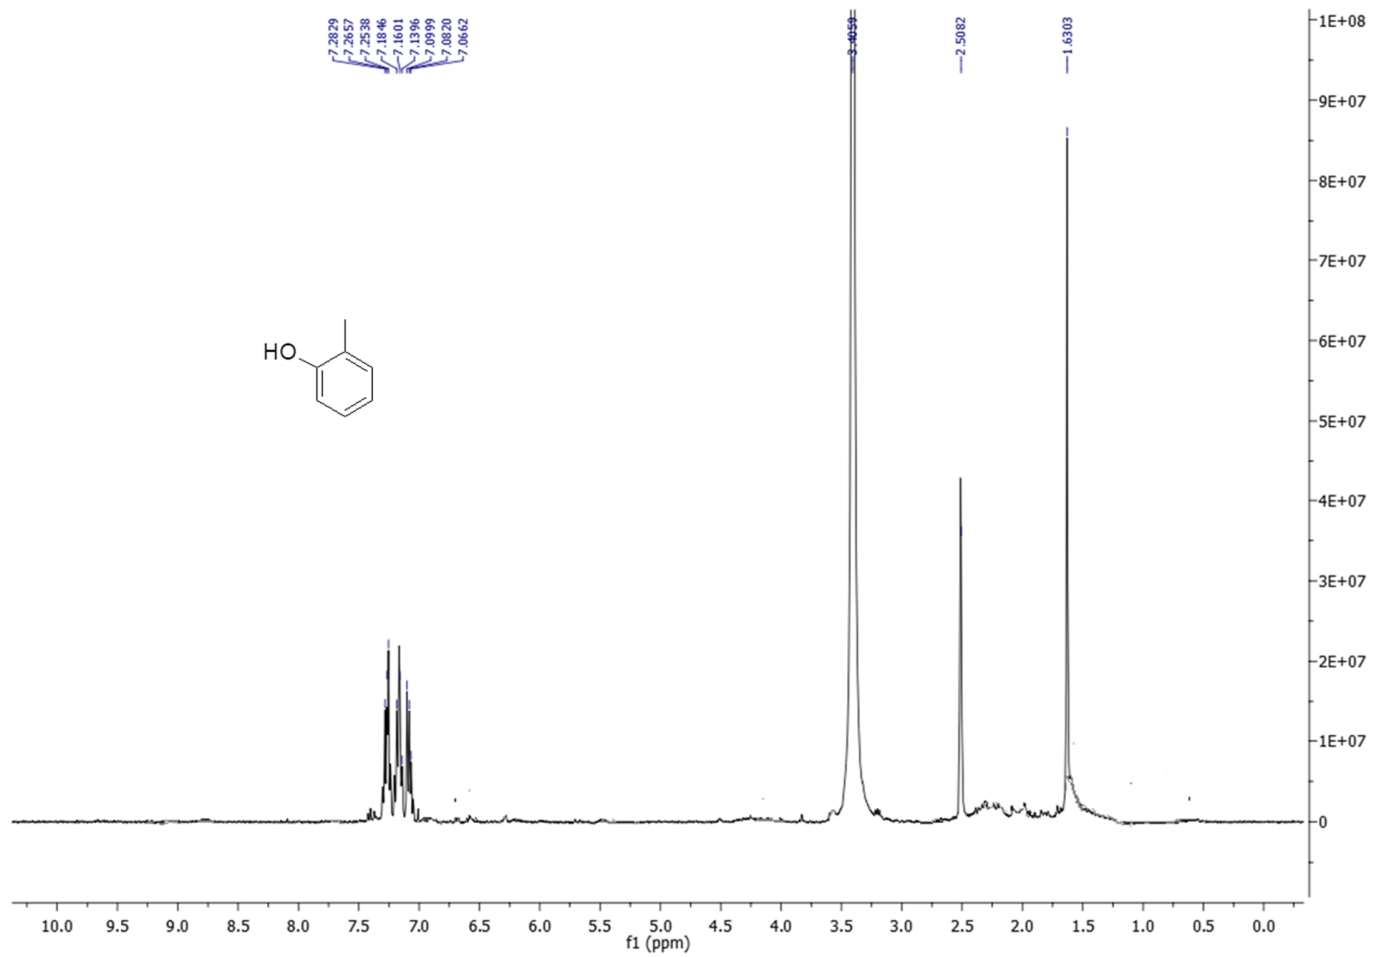

**Figure S13.** <sup>1</sup>H NMR spectrum of compound 14 measured in DMSO-*d*<sub>6</sub> at 400 MHz



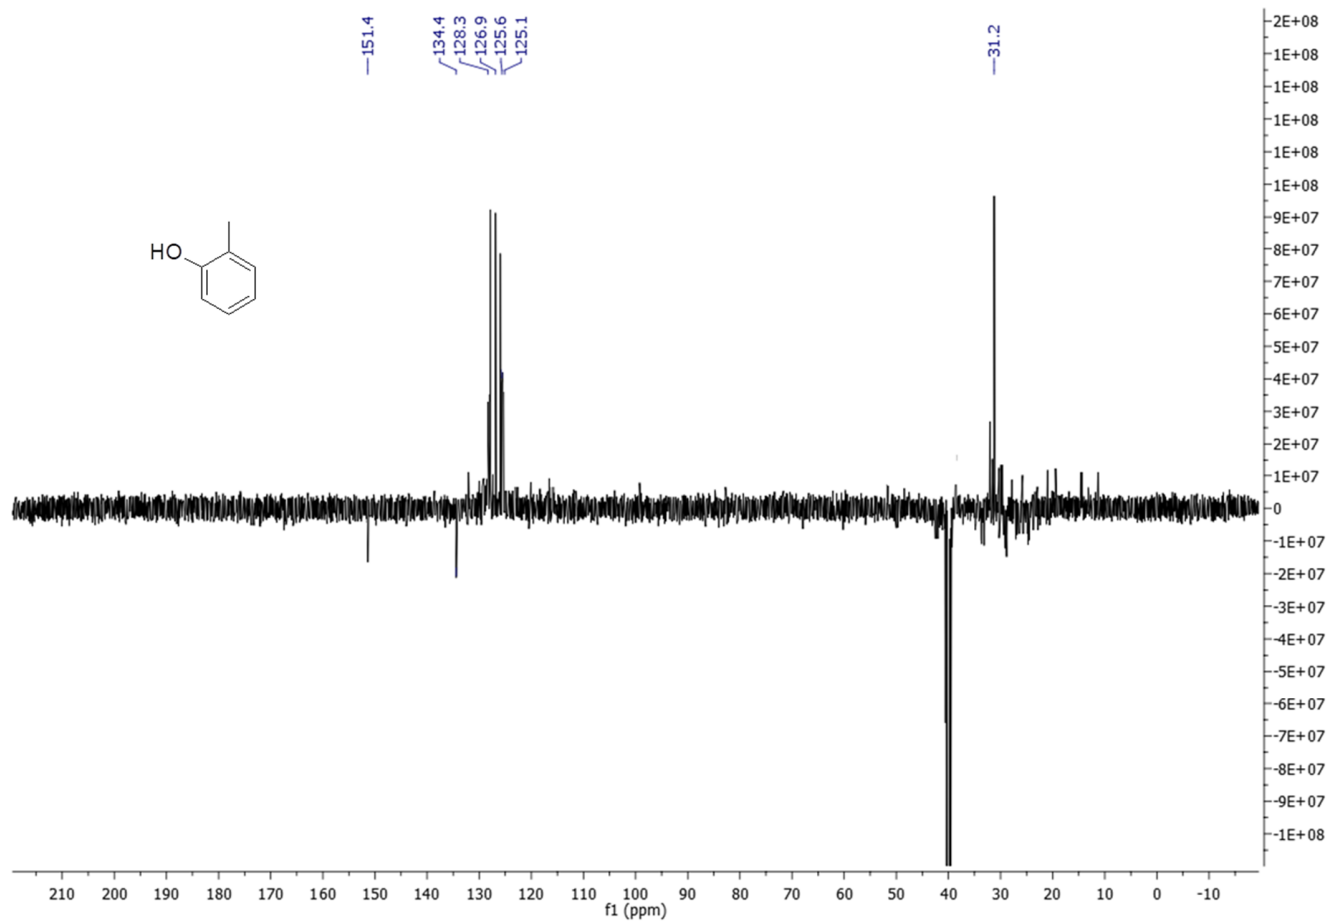

**Figure S14.** DEPT-Q NMR spectrum of compound **14** measured in DMSO- $d_6$  at 100 MHz.

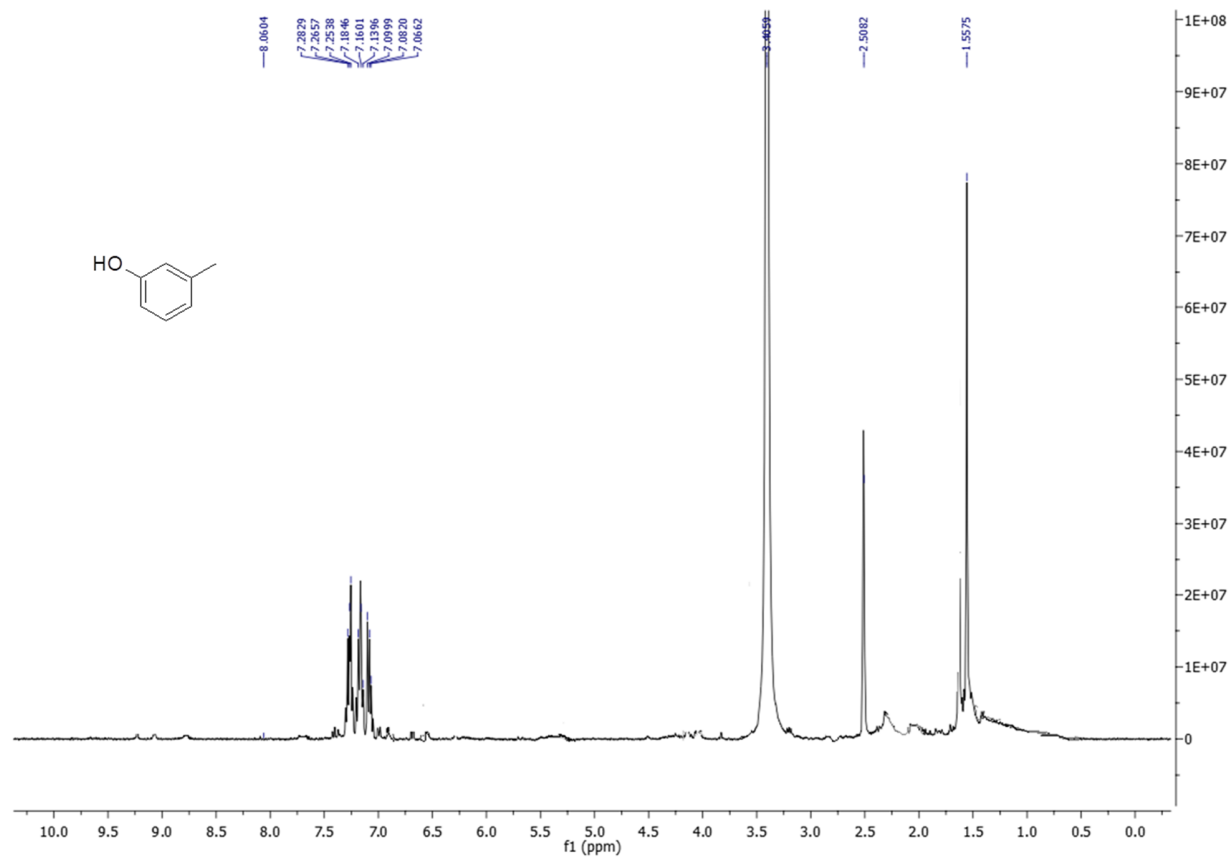

Figure S15.  $^1\text{H}$  NMR spectrum of compound **15** measured in  $\text{DMSO-}d_6$  at 400 MHz

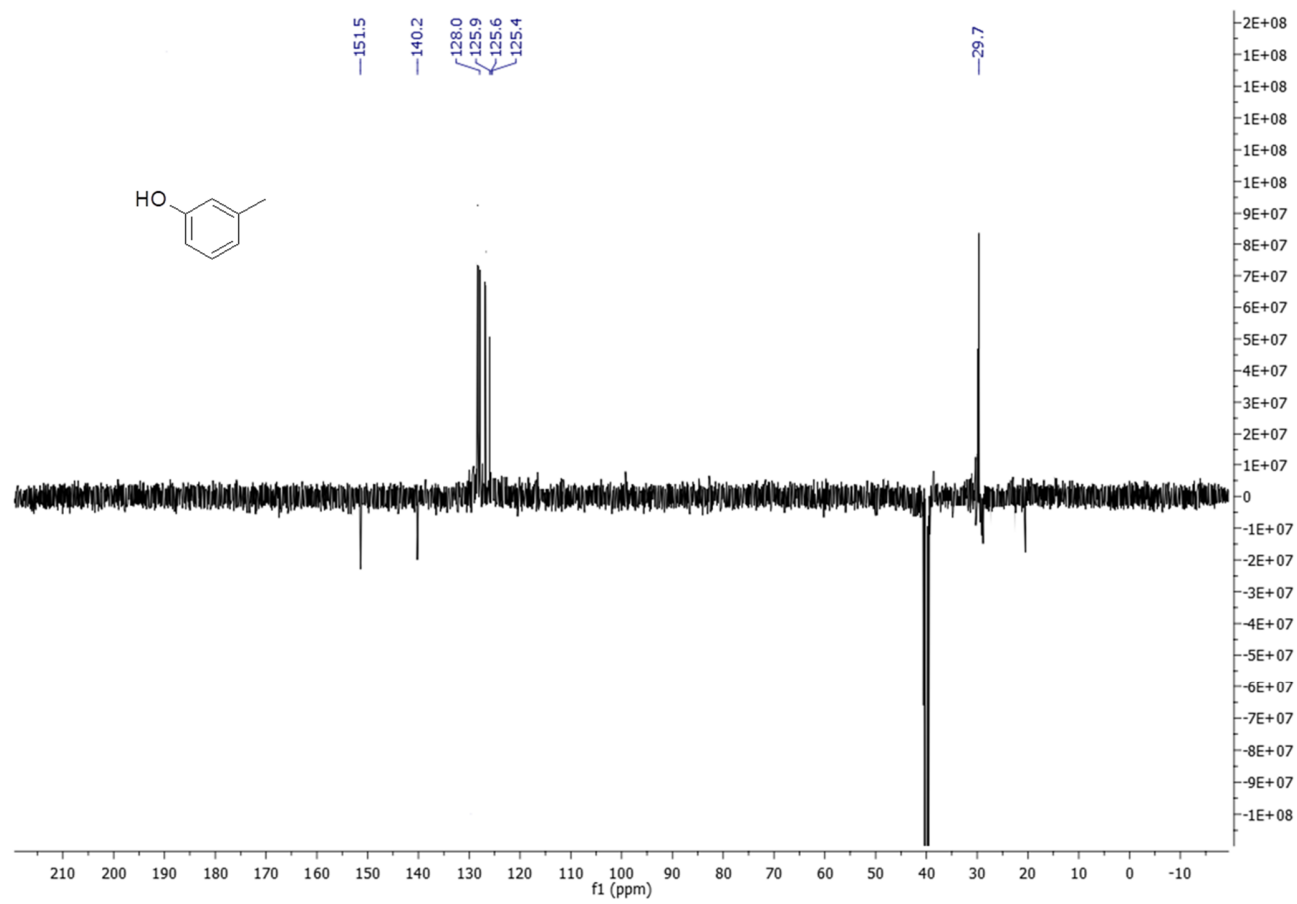

**Figure S16.** DEPT-Q NMR spectrum of compound **15** measured in DMSO- $d_6$  at 100 MHz

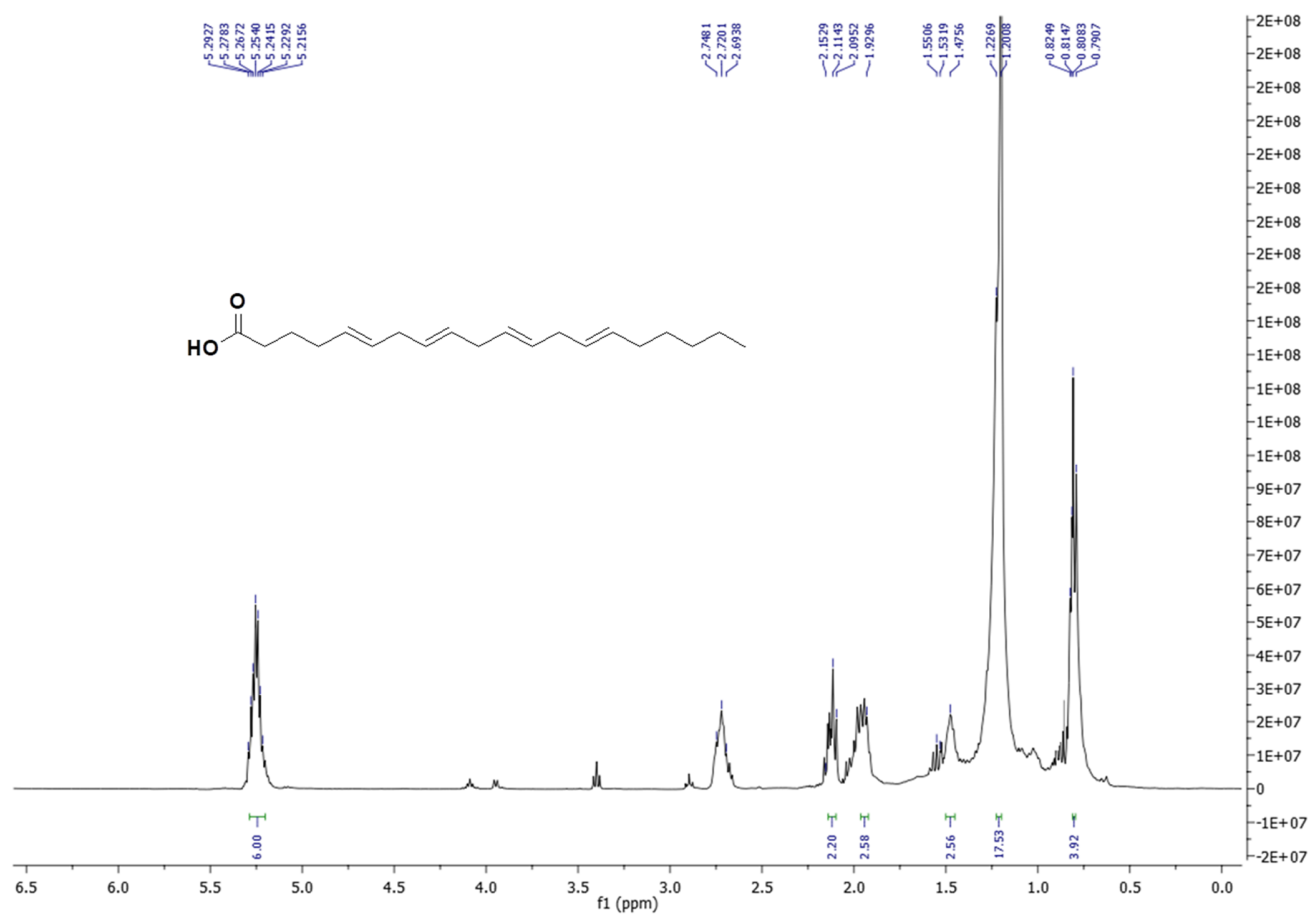

Figure S17. <sup>1</sup>H NMR spectrum of compound 16 measured in DMSO-*d*<sub>6</sub> at 400 MHz

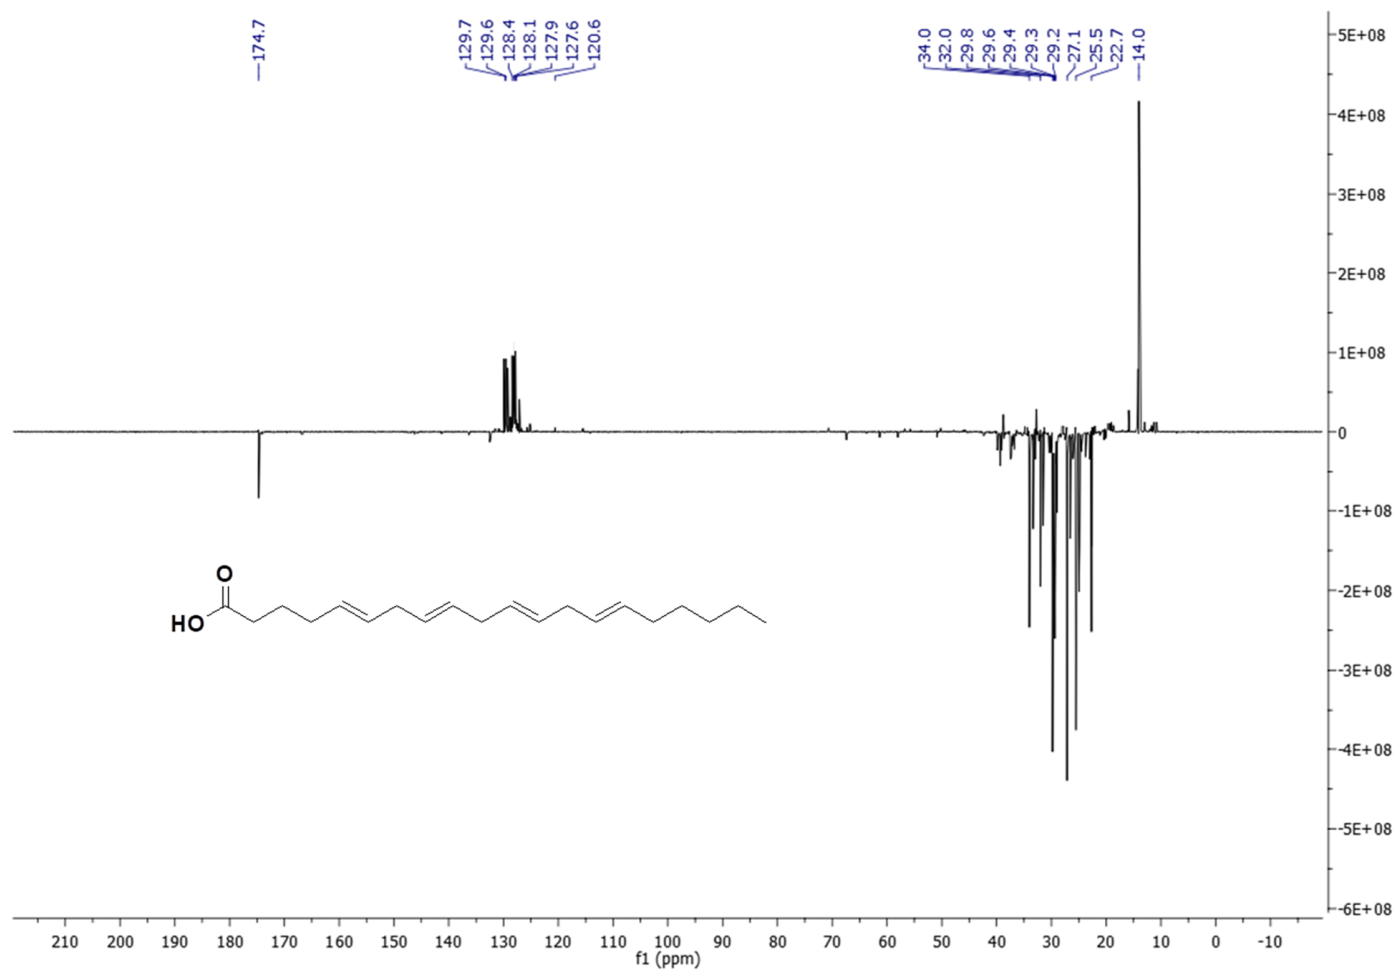

**Figure S18.** DEPT-Q NMR spectrum of compound **16** measured in DMSO-*d*<sub>6</sub> at 100 MHz

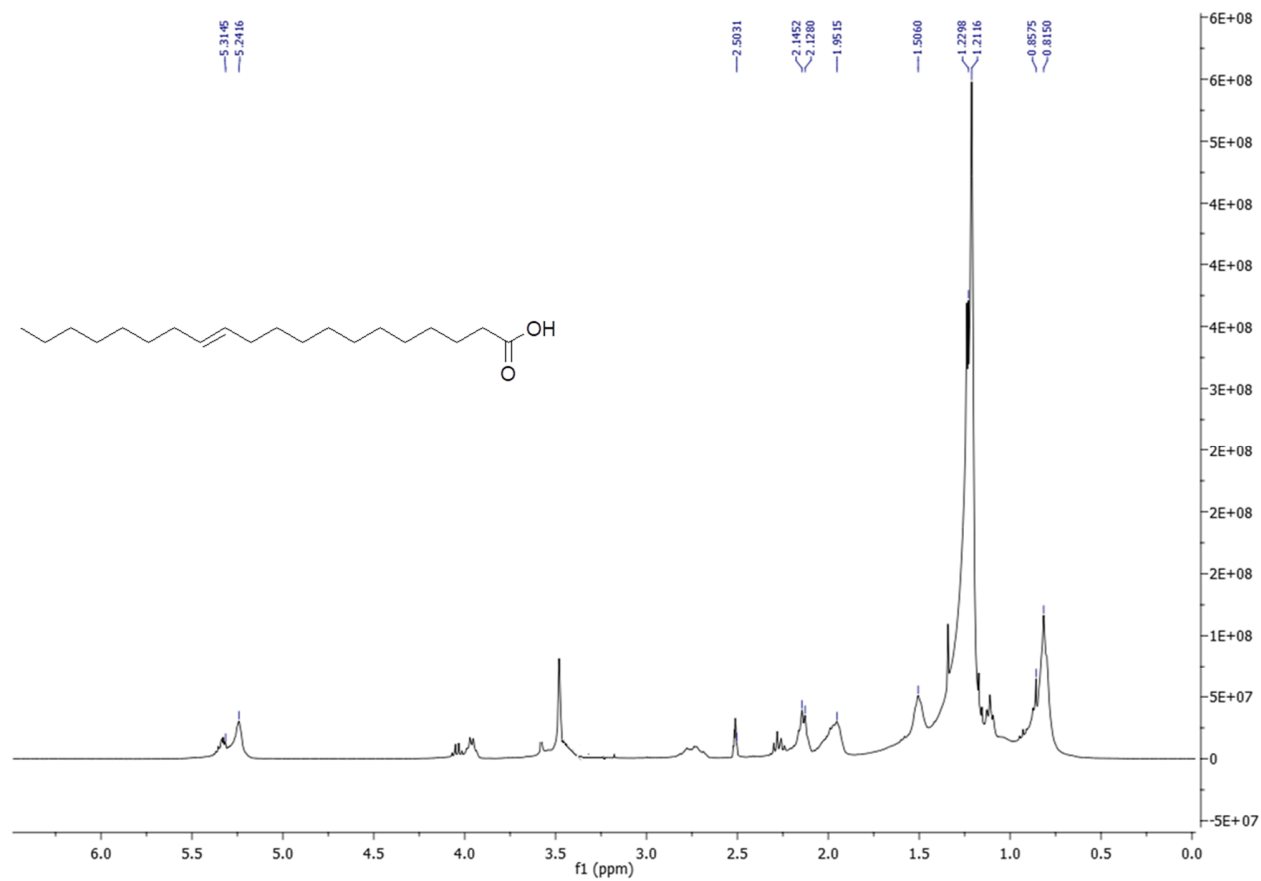

**Figure S19.** <sup>1</sup>H NMR spectrum of compound 17 measured in DMSO-*d*<sub>6</sub> at 400 MHz

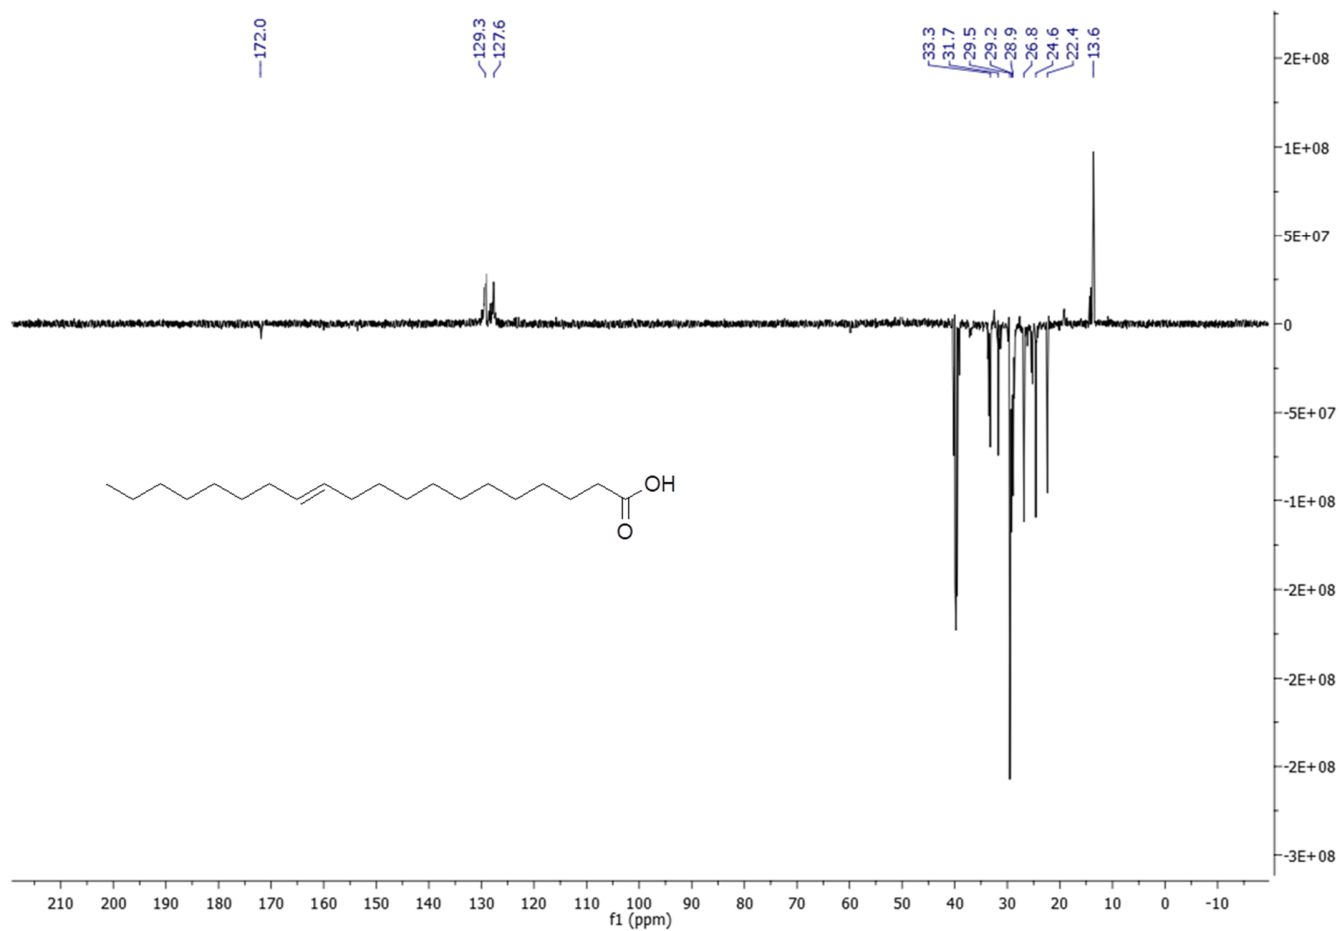

Figure S20. DEPT-Q NMR spectrum of compound 17 measured in DMSO- $d_6$  at 100 MHz

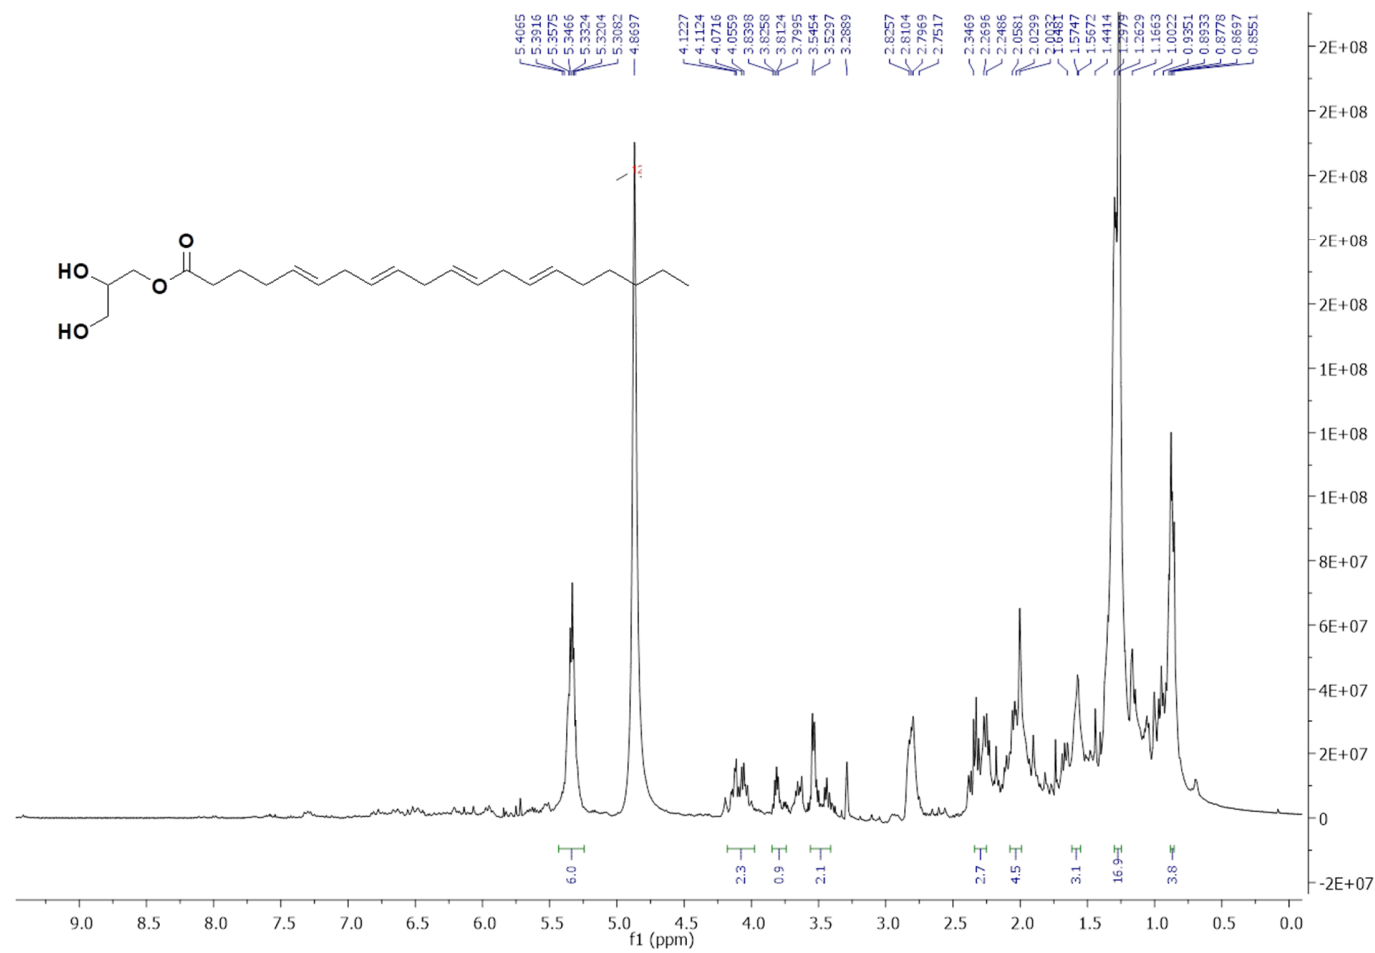

**Figure S21.**  $^1\text{H}$  NMR spectrum of compound **18** measured in  $\text{CD}_3\text{OD}-d_4$  at 400 MHz



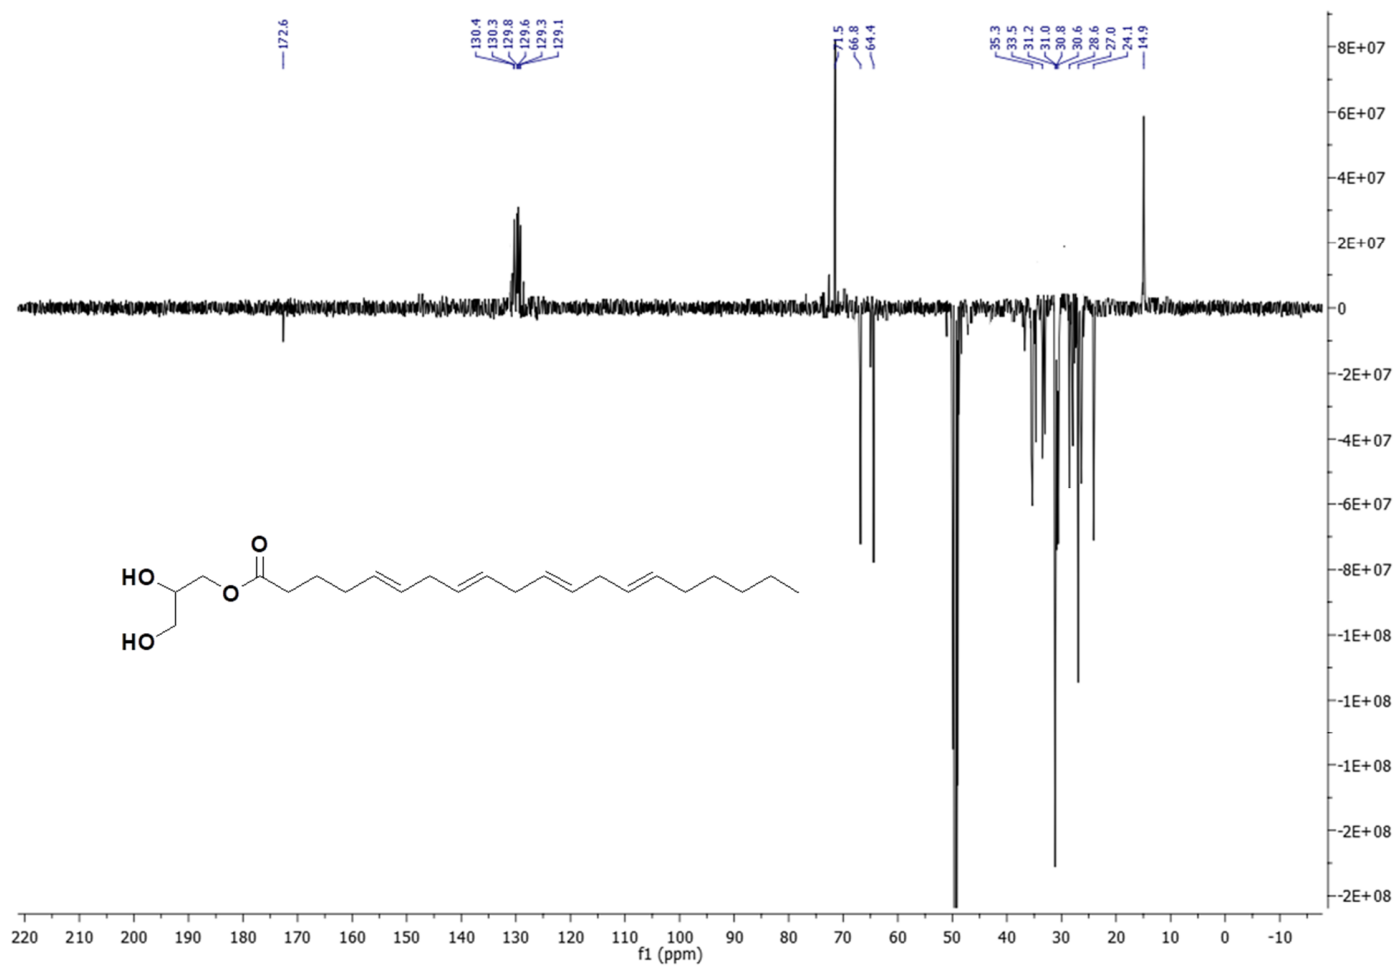

Figure S22. DEPT-Q NMR spectrum of compound 18 measured in CD<sub>3</sub>OD-*d*<sub>6</sub> at 100 MHz

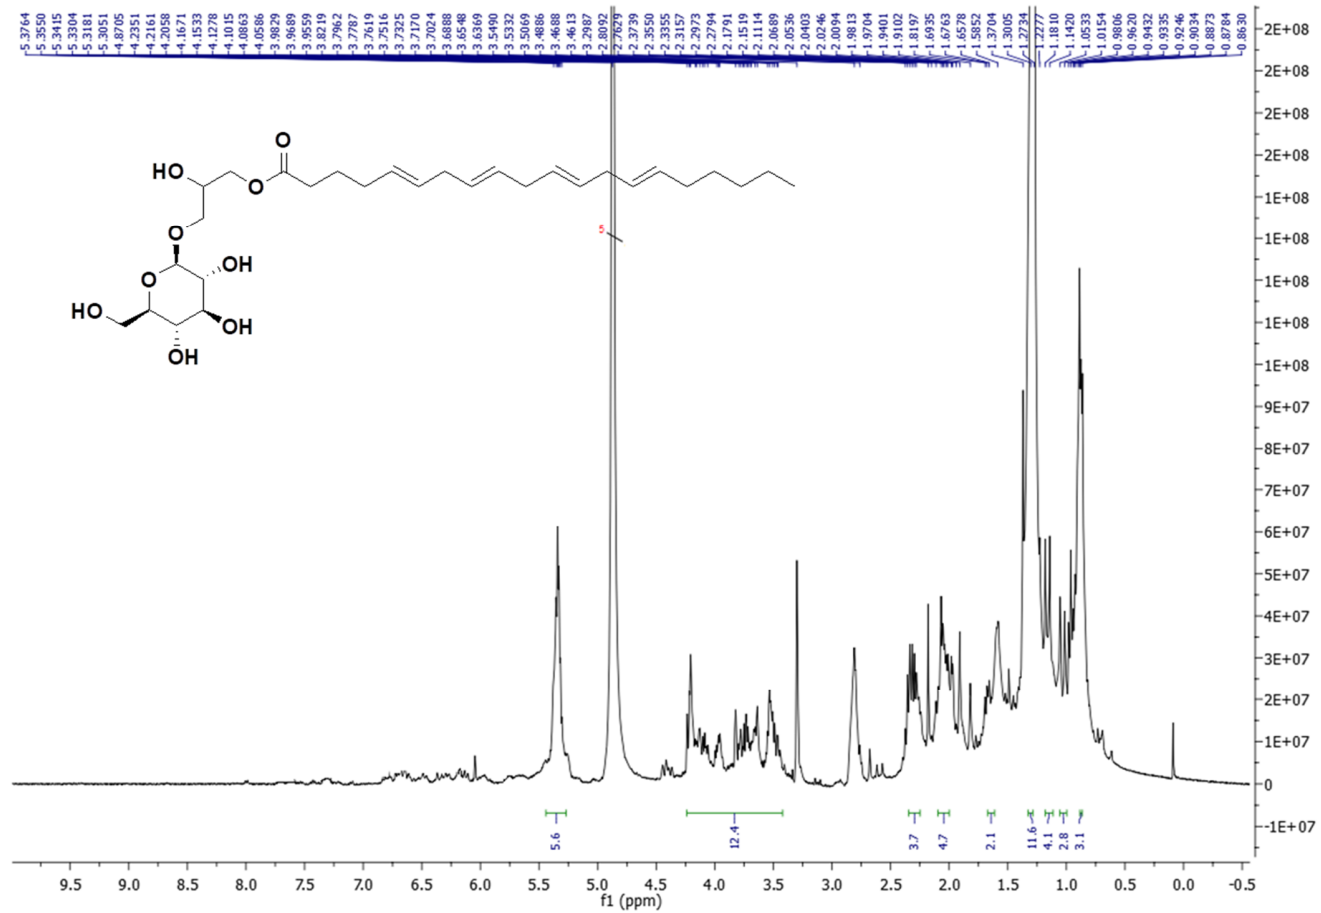

Figure S23. <sup>1</sup>H NMR spectrum of compound **19** measured in CD<sub>3</sub>OD-*d*<sub>4</sub> at 400 MHz

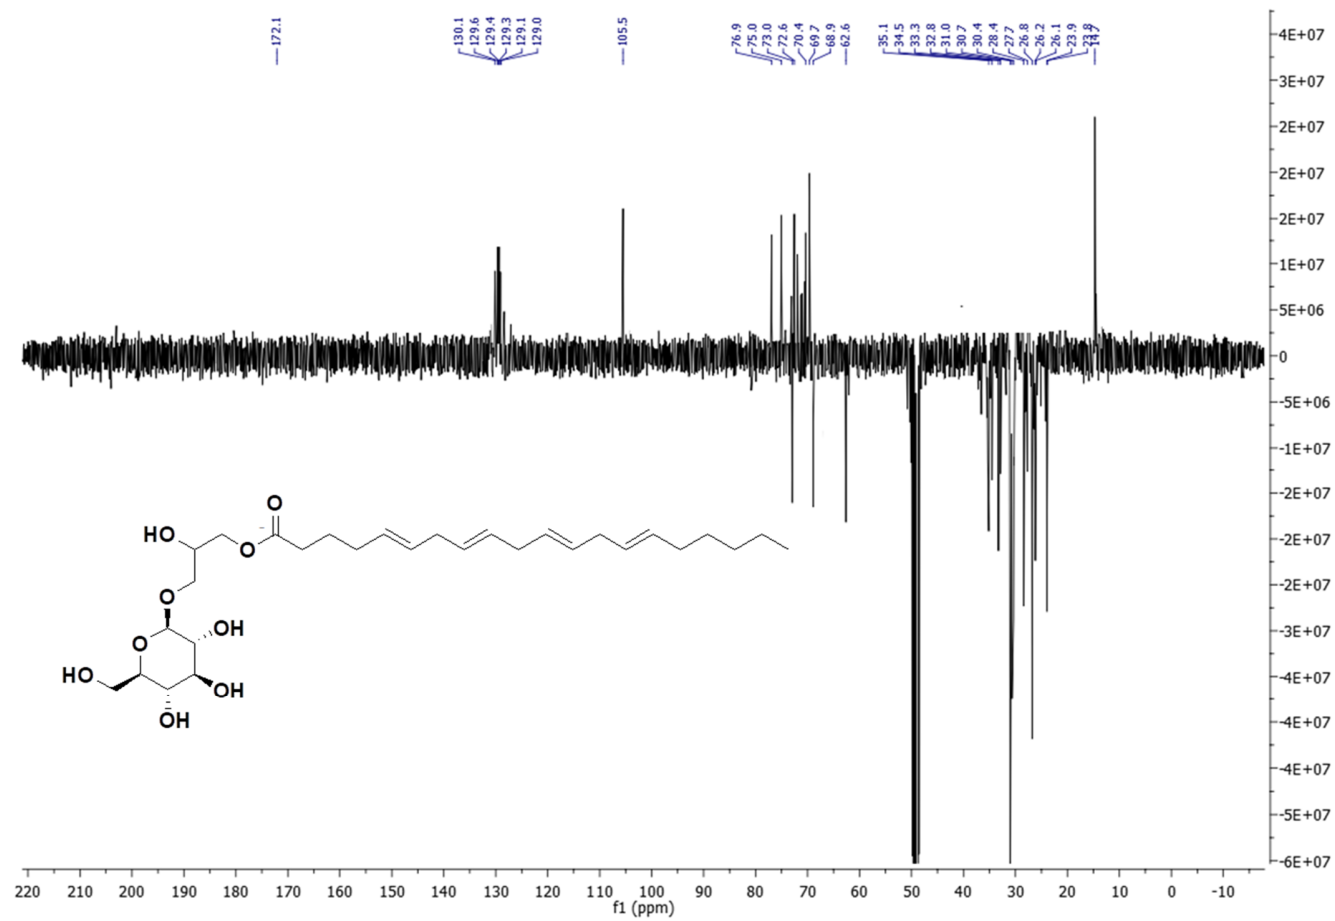

Figure S24. DEPT-Q NMR spectrum of compound **19** measured in  $\text{CD}_3\text{OD}-d_6$  at 100 MHz

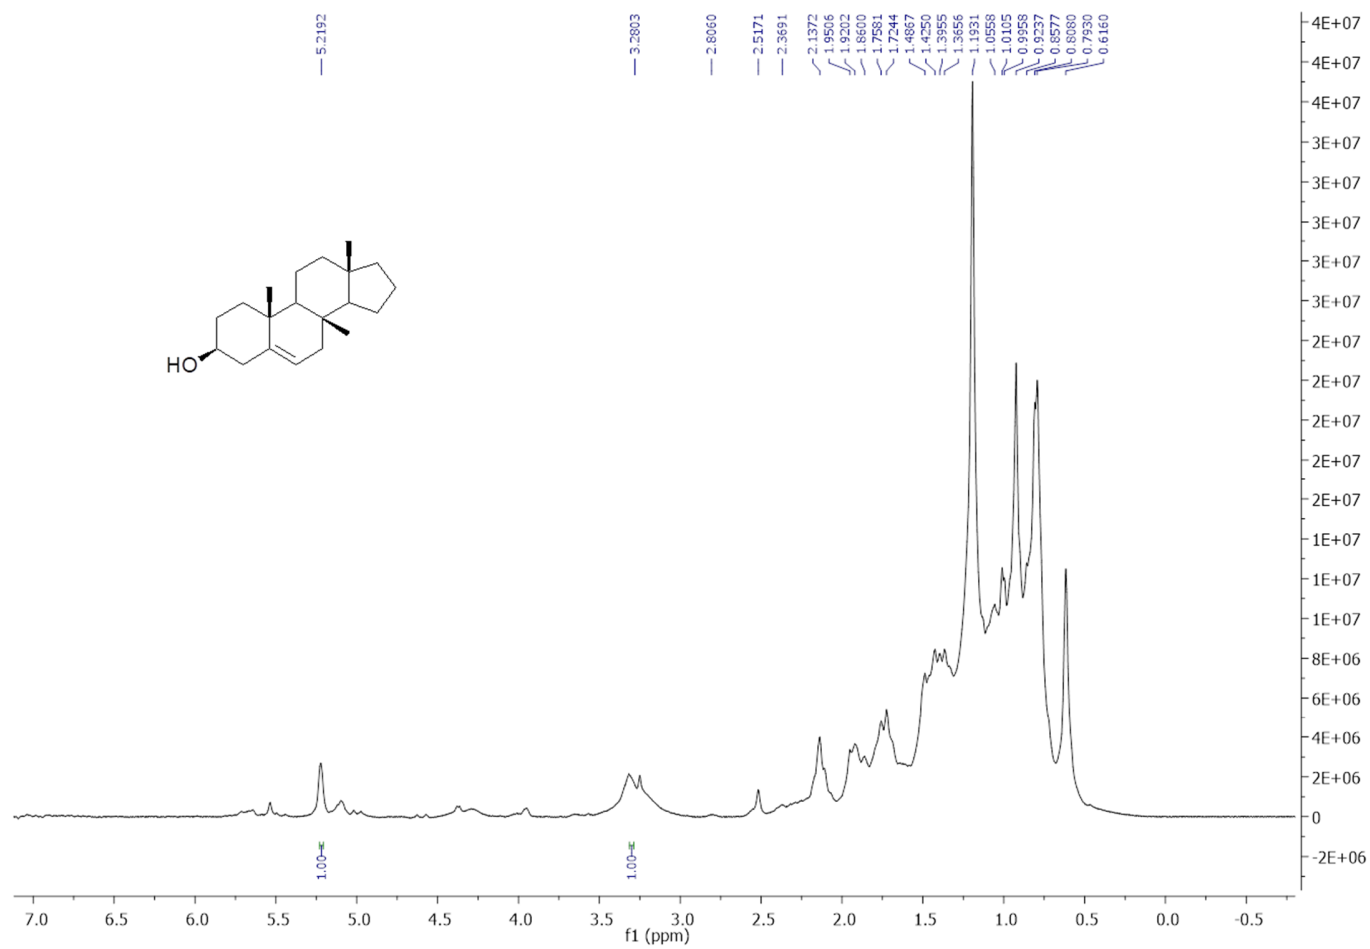

Figure S25.  $^1\text{H}$  NMR spectrum of compound 20 measured in  $\text{DMSO-}d_6$  at 400 MHz

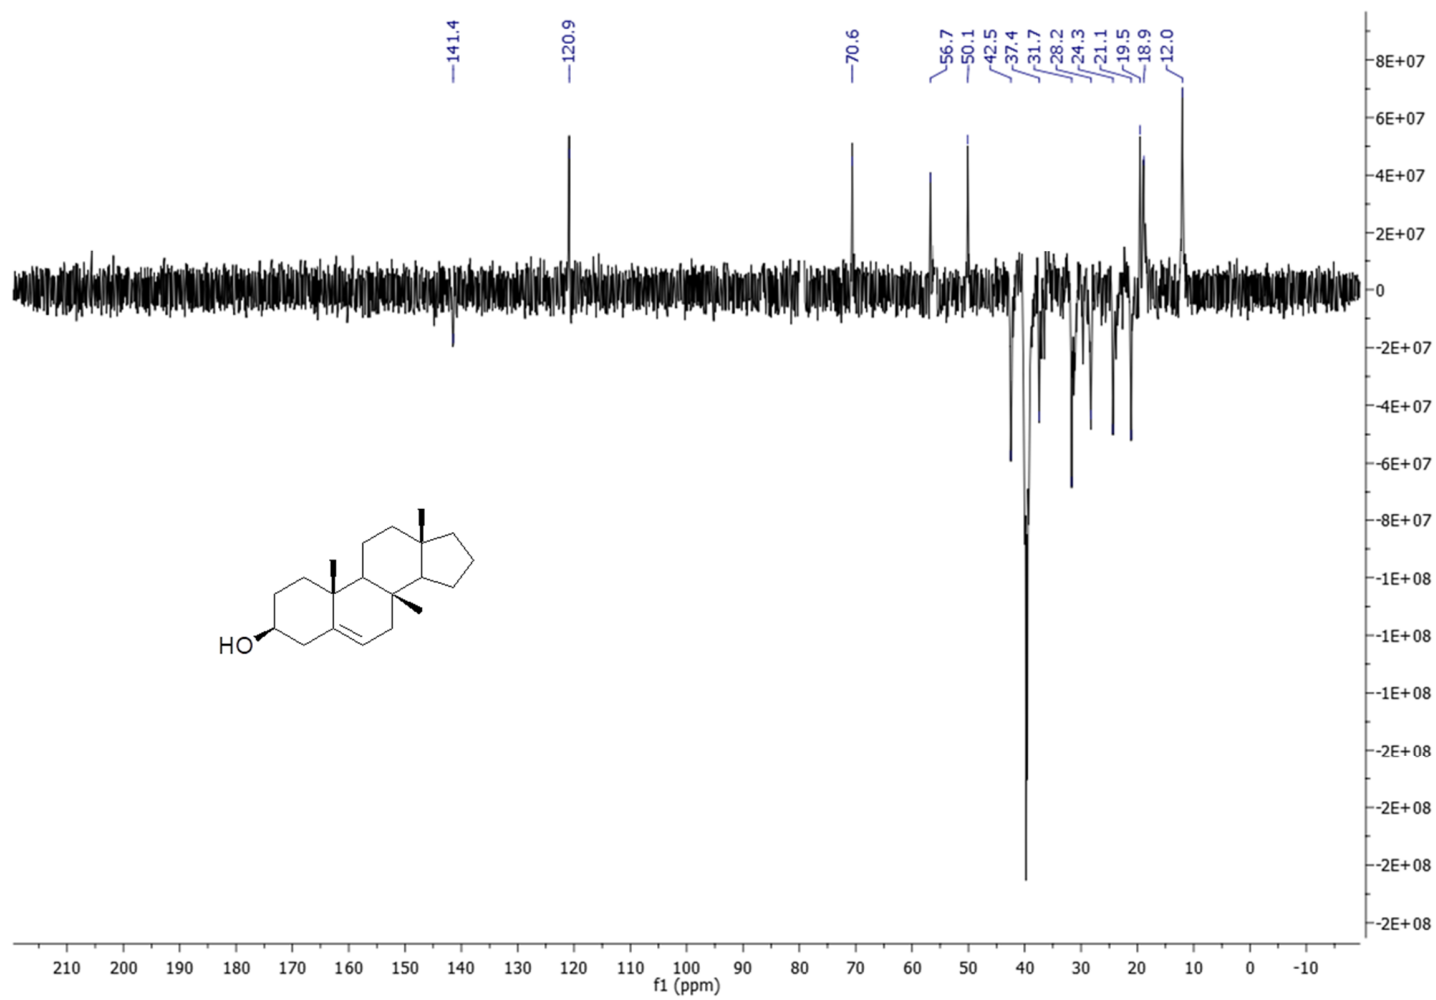

**Figure S26.** DEPT-Q NMR spectrum of compound **20** measured in DMSO- $d_6$  at 100 MHz

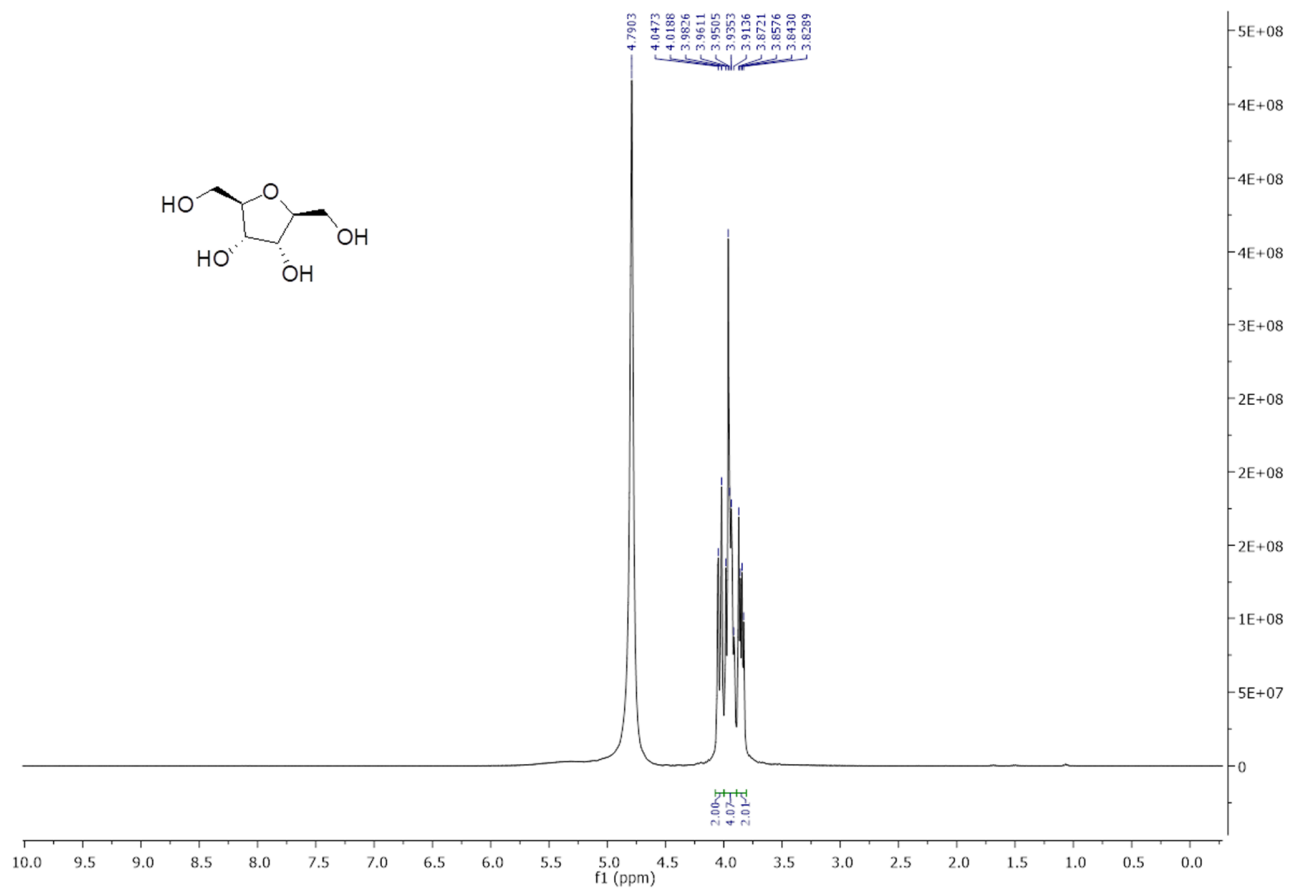

**Figure S27.** <sup>1</sup>H NMR spectrum of compound **21** measured in D<sub>2</sub>O at 400 MHz

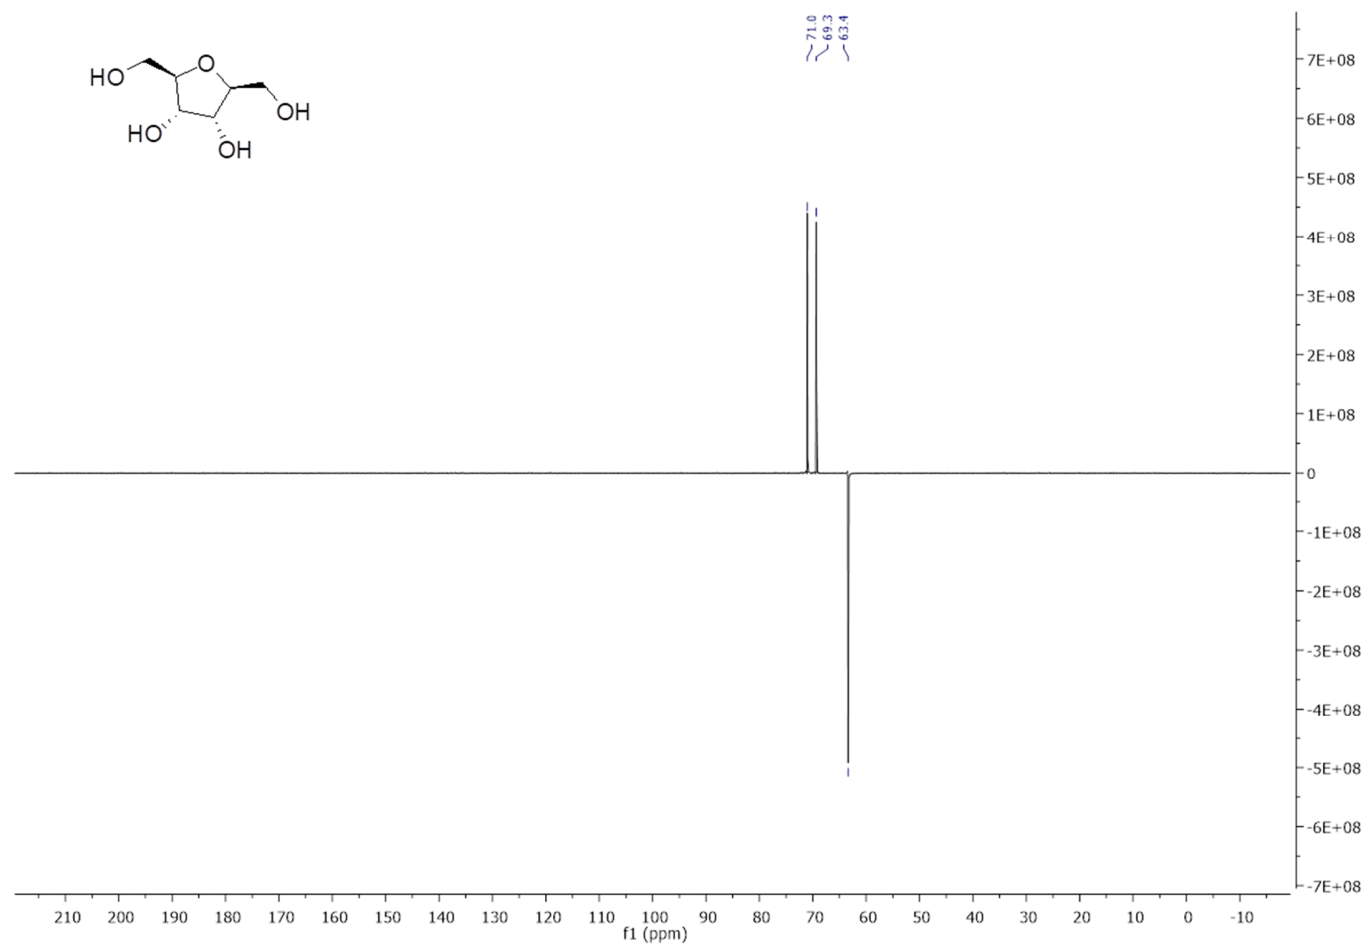

Figure S28. DEPT-Q NMR spectrum of compound **21** measured in D<sub>2</sub>O at 100 MHz
